# Supplementary material for: Per and polyfluoroalkylated substances (PFAS) target and EOF analyses in ski wax, snowmelts, and soil from skiing areas
Source: Royal Society of Chemistry journal article supplement (doi:10.1039/d3em00375b), 2023-01-01
Supplement: d3em00375b1.pdf [file d3em00375b1.pdf]

## Supplementary material

### Per and polyfluoroalkylated substances (PFAS) target and EOF analyses in ski wax, snowmelts, and soil from skiing areas

Viktorija Müller<sup>1,2</sup>, Larissa Cristine Andrade Costa<sup>3</sup>, Filipe Soares Rondan<sup>3</sup>, Eleonora Matic<sup>2</sup> Marcia  
Foster Mesko<sup>3</sup>, Andrew Kindness<sup>1,4</sup>, Jörg Feldmann<sup>2\*</sup>

1: The James Hutton Institute, Craigiebuckler, Aberdeen AB15 8QH, United Kingdom

2: Institute of Chemistry, University of Graz, Universitätsplatz 1, 8010 Graz, Austria

3: Universidade Federal de Pelotas, 96010-610 Pelotas, RS, Brazil

4: University of KwaZulu Natal, School of Chemistry & Physics, Private Bag X54001, Westville  
Campus, ZA-4000 Durban, South Africa

Corresponding author: joerg.feldmann@uni-graz.at

## Table of Contents

|                                                                                                                                                                                                        |          |
|--------------------------------------------------------------------------------------------------------------------------------------------------------------------------------------------------------|----------|
| <b>Sample preparation</b> .....                                                                                                                                                                        | <b>3</b> |
| Preconcentration and extraction. ....                                                                                                                                                                  | 3        |
| Microwave-induced combustion. ....                                                                                                                                                                     | 3        |
| <b>Instrumentation</b> .....                                                                                                                                                                           | <b>4</b> |
| Targeted analysis. ....                                                                                                                                                                                | 4        |
| Combustion ion chromatography (CIC). ....                                                                                                                                                              | 4        |
| High-resolution graphite furnace molecular absorption spectrometry (HR-GF-MAS). ....                                                                                                                   | 4        |
| Ion chromatography for total fluorine in wax samples. ....                                                                                                                                             | 5        |
| Fluorine mass balance analysis. ....                                                                                                                                                                   | 5        |
| <b>Quality controls of the used analytical methodologies</b> .....                                                                                                                                     | <b>6</b> |
| Table S1. List of analytes and their acronyms. ....                                                                                                                                                    | 6        |
| Table S2. List of chemicals, consumables and instruments used. ....                                                                                                                                    | 8        |
| Table S3a. Collected snow samples from Teichalm (TA samples), Klippitztörl (KP samples), Lachtal (LTSN samples) and Schladming (SD samples). ....                                                      | 10       |
| Table S3b. Collected soil samples from Lachtal (LT), Klippitztörl (KPS) and Schladming (SDS). ....                                                                                                     | 11       |
| Table S3c. List of purchased ski waxes. ....                                                                                                                                                           | 12       |
| Table S4a. List of monitored transitions and MS parameters. ....                                                                                                                                       | 13       |
| Table S4b. LC method. ....                                                                                                                                                                             | 15       |
| Table S5. Concentration of target PFAS in soil and wax samples in ng/g and snowmelt in ng/L. ....                                                                                                      | 16       |
| Table S5. Table S5. Concentration of target PFAS as well as the sum of target PFAS in soil and wax samples in ng/g (EOF in ng F/g) and snowmelt in ng/L (EOF ng F/L) and % of target PFAS in EOF. .... | 20       |
| Table S6a. Average recoveries $\pm$ standard deviation (n=3) of PFAS from different sample media (%) using target analysis. ....                                                                       | 24       |
| Table S6b. Average recoveries $\pm$ standard deviation (n=3) of isotopically labelled PFAS from different sample media (%) using target analysis. ....                                                 | 25       |
| Table S7. Average recoveries $\pm$ standard deviation (n=3) of EOF analysis with CIC and with HR-GF-MAS* .....                                                                                         | 25       |
| Table S8. Average recoveries $\pm$ standard deviation (n=3) of TF analysis (%). ....                                                                                                                   | 25       |
| Table 9. EOF concentration in wax samples extracted with hexane, measured with CIC. EOF is in $\mu\text{g F/g}$ . ....                                                                                 | 26       |
| Table S10. EOF concentrations in wax samples, extracted with MetOH, measured with HR-GF-MAS .....                                                                                                      | 27       |
| Table S11. Enrichment factor. ....                                                                                                                                                                     | 28       |
| Table S12. Instrumental and averaged method limit of quantifications for target PFAS analysis. ....                                                                                                    | 30       |
| Table S13. Averaged method limit of quantifications for EOF analysis (with CIC and HR-GF-MAS). ....                                                                                                    | 31       |
| Table S14. Total fluorine concentration in wax samples. ....                                                                                                                                           | 31       |
| Figure S1. Klippitztörl soil ion chromatogram with CIC in KPS02 sample spiked with 1 ppm PFAS mix. ....                                                                                                | 32       |
| Figure S2. Klippitztörl soil ion chromatogram with CIC in KPS blank soil from a non-skiing area. ....                                                                                                  | 33       |
| Figure S3a-d. Schematic representation of sampling sites and samples. ....                                                                                                                             | 34       |

## Sample preparation

### Preconcentration and extraction

Snowmelt samples (around 200 g each) were directly put through solid phase extraction (SPE) with Oasis WAX cartridges (150mg, 30 $\mu$ m, Waters) for preconcentration and sample clean-up purposes. SPE process was adapted from Taniyasu et al.(2) with slight modifications: Oasis WAX cartridges were conditioned with 4 mL 0.1 % (v/v) ammonia (NH<sub>4</sub>OH) in methanol, 4 mL methanol and 4mL ultrapure water (Milli-Pore, 18 M  $\Omega$  cm ) in this order. The extracts and snowmelts were loaded onto the cartridges then the cartridges were washed with 4 mL 25 mmol L<sup>-1</sup> ammonium acetate (CH<sub>3</sub>COONH<sub>4</sub>) in ultrapure water. The cartridges were eluted into small solvent washed glass vials with 4 mL methanol and 4 mL 0.1 % (v/v) ammonia in methanol. The eluents were evaporated to dryness using N<sub>2</sub> gas without heating, then reconstituted into solvent washed Eppendorf vials with 2 x 0.5 mL 50 % (v/v) methanol water mixture. The Eppendorf tubes were centrifuged at 13000 rpm for 5 min then the samples were divided. The top 450  $\mu$ L was taken into muffled HPLC vials and 50  $\mu$ L of 50  $\mu$ g L<sup>-1</sup> isotopically labelled PFAS internal standard were added for targeted analysis with HPLC-MS/MS. 150  $\mu$ L of the samples were taken into HPLC vials with conical inserts for total extractable F determination with CIC.

Soil samples were extracted as described previously by Higgins et al. (3)with slight modifications: follows: 2 g soil sample was weighed in solvent washed centrifuge tube. 10 mL of 90:10% (v/v) methanol: acetic acid solution 1 % (v/v) was added. The sample was sonicated for 20 mins in sonication bath, then centrifuged for 5 min at 3000 revolution per minute (rpm) and the supernatant was collected. This process was repeated 3 more times to result in a total of 40 mL extract. The extract was then cleaned up and preconcentrated using SPE and reconstituted as described above.

Extraction of wax samples were adapted from Plassmann & Berger (4), with slight modifications: 200 mg sample was weighed into solvent washed centrifuge tubes. 5 mL methanol was added, and the sample was sonicated for an hour in sonication bath then left at 4 °C overnight. The samples were then centrifuged at 4000 rpm for 5 min and the supernatant was collected into another solvent washed centrifuge tubes. This process was repeated 1 more time to give a total of 10 mL extracts which were evaporated to dryness with N<sub>2</sub> gas. The samples were then reconstituted into solvent washed Eppendorf tubes with 2 x 0.5 mL methanol. The Eppendorf tubes were centrifuged at 13000 rpm for 5 min then divided as described above. For EOF analysis, where the packaging label on the wax stated that it contained F, 10  $\mu$ L of the extract was taken, diluted to 200  $\mu$ L with methanol and measured with CIC and HR-GF-MAS.

Additionally, to check the effect of different solutions have on EOF, 5 mL hexane was added to 10 mg wax samples into pre solvent washed centrifuge tubes. Sonicated for an hour in sonication bath, centrifuged at 4000 rpm for 5 min. An aliquot was taken for total extractable F quantification with CIC and HR-GF-MAS.

### Microwave-induced combustion

Microwave-induced combustion (MIC) was used the total fluorine content analysis of solid wax samples. The method used was based on the previous paper (5), approximately 80 mg of sample were weighed and wrapped in a low-density polyethylene film. The films were heat sealed and the excess film was removed. After that, the wrappers were placed on quartz holders containing a disc of filter paper previously moistened with 50  $\mu$ L of 6 mol L<sup>-1</sup> ammonium nitrate (NH<sub>4</sub>NO<sub>3</sub>) (ignition solution). The quartz holders were placed into quartz vessels, in which was previously added 6 mL of absorbing solution (150 mmol L<sup>-1</sup> of NH<sub>4</sub>OH). The vessels were closed, positioned in the rotor and pressurized with 20 bar of O<sub>2</sub>. Then, the following irradiation program was applied: i)1400 W for 5 min (combustion

and reflux steps), *ii*) 0 W for 20 min (cooling step). Subsequently, the pressure was released, and the solutions were collected in volumetric flasks. The volume was adjusted to 25 mL with ultrapure water for further analysis by IC. To be able to digest a larger sample mass and, consequently, to obtain lower limits of detection and quantification, successive digestions were carried out. For this, three sequential burns (using 50 mg of sample in each one) were performed using the same absorbing solution for all rounds, totalling approximately 150 mg of sample mass, as proposed in previous study (6). For the liquid sample the procedure was based on previous study (7). The wraps were prepared by adding 90  $\mu\text{L}$  of the liquid sample over 100 mg of cellulose (used as a combustion aid) before sealing the wrapper. The other conditions used for MIC method were the same as previously described. To assess the repeatability and to check for losses during sample preparation, 25  $\mu\text{L}$  of a 64  $\text{mg mL}^{-1}$  F standard was spiked to a sample previously the sample preparation by MIC.

#### Instrumentation

*Targeted analysis.* Agilent 1200 infinity HPLC (Agilent Technologies, Germany) combined with a BrownLee SPP C18 column (2.7  $\mu\text{m}$ , 3 x 100 mm, PerkinElmer, UK) and a BrownLee SPP guard column (2.7  $\mu\text{m}$ , 3 x 5 mm, PerkinElmer, UK) were used for the separation of the analytes by LC. A gradient was used for the separation of target PFAS, consisting of 5  $\text{mmol L}^{-1}$   $\text{CH}_3\text{COONH}_4$  in ultrapure water and 100% LCMS grade ACN were used as mobile phase A and B. The LC system was coupled to an Agilent 6465 Triple Quadrupole MS/MS (Agilent Technologies, Germany). The MS was used in multiple response monitoring (MRM) mode. Two transitions were monitored (quantifier and qualifier ions) for the analytes except PFBA, PFPA, PFdDA, PFOSA, FOSEs where only one transition was monitored. Transitions and LC method are listed in Table S4 in SI. Due to the large number of transitions, the transitions were monitored only around their retention times. Negative ESI mode was used for the determination of different PFAS. Nitrogen was used as a collision gas.

#### *Total extractable organic fluorine (EOF) and total fluorine (TF)*

Combustion ion chromatography (CIC). EOF measurement were carried out using a Thermo-Mitsubishi Analytech CIC. Sample extracts (100  $\mu\text{L}$ ) were placed in a ceramic sample boat containing glass wool for better dispersion of the fluids. Sample boats were pre-baked 3 times prior to sample combustion to minimize background contamination (8). Samples were introduced into a combustion oven (HF-210, Mitsubishi Analytech) heated to 1100  $^\circ\text{C}$  with argon (200  $\text{mL min}^{-1}$ ), argon with water (100  $\text{mL min}^{-1}$ ) and oxygen (400  $\text{mL min}^{-1}$ ) flow rate. All combustion gases were collected in ultrapure water (GA-210, Mitsubishi Analytech), and the absorption solution (ultrapure water) was adjusted to 10 mL. 1.3 mL were injected onto a Hamilton PRP X100 anion exchange column (10  $\mu\text{m}$ , 4.6 x 250mm) equipped with a guard column (Dionex IonPac AS19 (2 x 50 mm)). Chromatographic separation was achieved using isocratic elution of 70  $\text{mmol L}^{-1}$  hydroxide mobile phase with 0.6  $\text{mL min}^{-1}$  flowrate. The acquisition time was 27 min.

High-resolution graphite furnace molecular absorption spectrometry (HR-GF-MAS). The method used for total fluorine in EOF was described previously in Akhdhar et al (9). A high-resolution continuum source atomic absorption spectrometer (contrAA 700, Analytik Jena, Germany) was used for all measurements. The spectrometer was equipped with a xenon short-arc lamp with a nominal power of 300 W operating in a hot-spot mode, which emits a spectral continuum between 190 and 900 nm and a charge-coupled device (CCD) array detector with 588 pixels, 200 of which are used for analytical purposes. The double monochromator consists of a prism pre-monochromator and an echelle grating monochromator for high resolution. All measurements were performed using the wavelength of

highest sensitivity for CaF at 606.429 nm, using the sum of the integrated absorbance of three pixels (peak volume selected absorbance, PVSA, AΣ3, int). Pyrolytically coated graphite tubes with PIN platform (Analytik Jena, Germany) and with transversal heating were used in all experiments (9).

Ion chromatography for total fluorine in wax samples. Total fluorine in wax samples was determined using an ion chromatograph (ICS-5000, Dionex/Thermo Fisher Scientific, USA) equipped with an IonPac AS11-HC analytical anion exchange column (4 μm, 2 x 250 mm) and an IonPac AG11-HC guard column (4 μm, 2 x 50 mm), at a controlled temperature of 36 °C. A Dionex ERS 500 anion electrolytically regenerated suppressor (2 mm, using the auto suppression external water mode at 0.18 mL min<sup>-1</sup>, and current from 2 to 80 mA), and an eluent source EGC 500 KOH generator cartridge with continuously regenerated anion-trap column (CR-ATC) were also used. The mobile phase used for the elution of the analyte was a KOH gradient from 1 to 80 mmol L<sup>-1</sup> at a flow rate of 0.28 mL min<sup>-1</sup>, and the injection volume used was 50 μL. The detection was performed using a conductivity cell at a controlled temperature (36 °C). The acquisition time was 33 min.

Fluorine mass balance analysis. Individual PFAS concentrations from target analysis, above the LOQ was converted into the corresponding concentration in fluorine in ng F g<sup>-1</sup>. Fluorine mass balance analysis was carried out by comparing the sum of converted PFAS to that obtained from EOF analyses with CIC. Limit of detection and quantification (LOD and LOQ) through the whole study were calculated from the standard error of the y intercept of the linear regression line. LOD and LOQ were determined as 3 x and 10 x the error of the y intercept, respectively.

*Equation 1. Calculation of identified PFAS from target PFAS and EOF.*

$$\% F \text{ as PFAS} = \frac{\sum \text{target PFAS as F}}{\text{EOF as F}} \times 100$$

Quality controls of the used analytical methodologies

*Method blanks.*

Soil method blanks contained PFBA, PFPA, PFOA, PFdDA, PFOS, PFOSA and N-EtFOSA. Their concentrations were <LOQ. During data analysis, the average areas of these analytes were subtracted from the samples, before processing them further, while snowmelt and wax method blanks contained no PFAS >LOD.

*Instrumental quality control.*

Instrumental quality controls were between 80-120% for all PFAS found in the samples, measured with HPLC-MS/MS. Recovery of BCR-461 reference material using CIC was  $95 \pm 3\%$ . These show that the instruments worked fine.

*Wax.*

Analyte recoveries for PFCAs and PFSAs were between  $42 \pm 9$  and  $90 \pm 4\%$ . For precursor PFAS the recoveries were between  $10 \pm 4$  and  $60 \pm 3\%$  depending on the analyte (table S6a). The only precursor compound found, 2-perfluorooctyl ethanoic acid (FOEA), had a recovery of  $10 \pm 4\%$ . Because of the low recovery for this analyte, the results obtained is semi-quantitative only. Recoveries of isotopically labelled PFAS (MPFAC-C-IS) is found between  $49 \pm 2$  and  $54 \pm 4\%$  which is consistent with the analyte recoveries (table S6b). Spiked wax extracts were measured with CIC and HR-GF-MAS as well. With CIC, wax methanol extracts had  $63 \pm 26\%$  recovery while recovery of hexane extracts was  $9 \pm 2\%$ . The lower recovery using hexane as extraction solution is to be expected, because the PFAS spiking solution contains mostly polar compounds. Only wax methanol extracts were measured with HR-GF-MAS, due to the insolubility of the Ca standard solution in hexane that is used for generating the CaF ions. Wax methanol extracts had  $63 \pm 21\%$  recovery, which agrees with the recovery observed with CIC. Recovery of TF analysis was found to be  $109 \pm 7\%$ , showing that MIC-IC combust the waxes completely.

*Soil.*

Analyte recoveries for PFCAs and PFSAs were between  $30 \pm 12$  and  $62 \pm 16\%$ . The recoveries decreased with C length. For precursor PFAS the recoveries were ranging from not being able to recover (0%) to  $88 \pm 17\%$  (table S6a). Recoveries of isotopically labelled PFAS (MPFAC-C-IS) is found between  $81 \pm 6$  and  $98 \pm 5\%$  (table S6b), hence the reliability of the quantitative analysis was adequate. Soil extracts, like wax extracts, also showed high variability in recoveries with CIC. The recovery was found to be  $191 \pm 70\%$ . As it was stated above, the recovery of BCR-461 reference material had excellent recovery using CIC, showing that CIC operates well. The high variability between the method recoveries is possibly due to high organic F content in the soil themselves, or analyte loss during combustion (volatilisation).

*Snowmelts.*

Analyte recoveries (%) for PFCAs and PFSAs were between  $70 \pm 0$  and  $113 \pm 9\%$ . except for PFhxDA ( $17 \pm 1\%$ ) and PFoDA ( $2 \pm 0\%$ ) (Table S6a). For precursor PFAS the recoveries were ranging from not being able to recover (0%) to  $100 \pm 15\%$  (table S6a). Recoveries of isotopically labelled PFAS (MPFAC-C-IS) were between  $89 \pm 5$  –  $96 \pm 5\%$ , which is consistent with the analyte recoveries (table S6b).

Table S1. List of analytes and their acronyms

| Name                                                        | Acronym          | Carbon number   |
|-------------------------------------------------------------|------------------|-----------------|
| <b><u>PFAS carboxylic acids</u></b>                         |                  |                 |
| <b>PFCA</b> s                                               |                  |                 |
| Perfluorobutanoic acid                                      | PFBA             | C <sub>4</sub>  |
| Perfluoropentanoic acid                                     | PFPA             | C <sub>5</sub>  |
| Perfluorohexanoic acid                                      | PFHxA            | C <sub>6</sub>  |
| Perfluoroheptanoic acid                                     | PFHpA            | C <sub>7</sub>  |
| Perfluorooctanoic acid                                      | PFOA             | C <sub>8</sub>  |
| Perfluorononanoic acid                                      | PFNA             | C <sub>9</sub>  |
| Perfluorodecanoic acid                                      | PFDA             | C <sub>10</sub> |
| Perfluoroundecanoic acid                                    | PFuDA            | C <sub>11</sub> |
| Perfluorododecanoic acid                                    | PFdDA            | C <sub>12</sub> |
| Perfluorotridecanoic acid                                   | PFtrDA           | C <sub>13</sub> |
| Perfluorotetradecanoic acid                                 | PFteDA           | C <sub>14</sub> |
| Perfluorohexadecanoic acid                                  | PFhxDA           | C <sub>16</sub> |
| Perfluorooctadecanoic acid                                  | PFoDA            | C <sub>18</sub> |
| <b><u>PFAS sulfonic acids</u></b>                           |                  |                 |
| <b>PFSA</b> s                                               |                  |                 |
| Perfluoro-1- butanesulfonic acid                            | PFBS             | C <sub>4</sub>  |
| Perfluoro-1-pentanesulfonic acid                            | PFPS             | C <sub>5</sub>  |
| Perfluoro-1-hexanesulfonic acid                             | PFHxS            | C <sub>6</sub>  |
| Perfluoro-1-heptanesulfonic acid                            | PFHpS            | C <sub>7</sub>  |
| Perfluoro-1-octanesulfonic acid                             | PFOS             | C <sub>8</sub>  |
| Perfluoro-1-nonanesulfonic acid                             | PFNS             | C <sub>9</sub>  |
| Perfluoro-1-decanesulfonic acid                             | PFDS             | C <sub>10</sub> |
| Perfluoro-1-dodecanesulfonic acid                           | PFDoS            | C <sub>12</sub> |
| <b><u>PFAS sulfonamides and sulfonamidoacetic acids</u></b> |                  |                 |
| Perfluoro-1-octanesulfonamide substances                    | PFOSA            |                 |
| Perfluorooctanesulfonamidoacetate                           | PFOSAA           |                 |
| <i>N</i> -ethyl perfluorooctyl sulfonamide                  | <i>N</i> -EtFOSA |                 |
| 2-( <i>N</i> -Methylperfluoro-1-octanesulfonamido)-ethanol  | <i>N</i> -MeFOSE |                 |
| 2-( <i>N</i> -ethylperfluoro-1-octanesulfonamido)-ethanol   | <i>N</i> -EtFOSE |                 |
| <b><u>Others</u></b>                                        |                  |                 |
| 4,8-Dioxa-3H-perfluorononanoic acid                         | ADONA            |                 |
| Hexafluoropropylene oxide dimer acid                        | GenX             |                 |
| Perfluorooctylphosphoric acid                               | PFOPA            |                 |
| 2-Perfluorooctyl ethanoic acid                              | FOEA             |                 |
| Na 8-Chloroperfluoro-1-octansulfonate                       | 8Cl-PFOS         |                 |
| Sodium 1H, 1H, 2H, 2H-perfluorodecane sulfonate             | 8:2 FTS          |                 |
| Na 1H, 1H, 2H, 2H-perfluorododecane sulfonate               | 10:2 FTS         |                 |

Table S2. List of chemicals, consumables and instruments used

| Chemicals and consumables                                                                    | Supplier                |
|----------------------------------------------------------------------------------------------|-------------------------|
| Acetonitrile, Chromasolv for HPLC >99.9%                                                     | Bartelt                 |
| Methanol, Chromasolv for HPLC >99.9%                                                         | Bartelt                 |
| Ultrapure water, 18 M $\Omega$ cm                                                            | Milli-Pore              |
| Ammonium acetate, Optima, LC/MS grade                                                        | Fisher Chemicals        |
| Ammonium nitrate                                                                             | Fluka                   |
| Acetic acid, glacial                                                                         | Fisher Chemicals        |
| Ammonia solution, Rotipuran >25%                                                             | Roth                    |
| Zirconium single element ICP standard from $ZrOCl_2$ in HCl 7% for coating the graphite tube | Merck                   |
| F single element IC standard from NaF 99.999%                                                | Fisher Chemicals        |
| Hexane, Chromasolv for HPLC >97.0%                                                           | Fisher Chemicals        |
| KOH eluent, Dionex EGC III KOH                                                               | Thermo Scientific       |
| Calcium single element ICP standard from $Ca(NO_3)_2$ in $HNO_3$                             | Merck                   |
| Native perfluorinated compound mix (PFAC-MXC) 2000 ng/mL                                     | Wellington laboratories |
| Mass labelled perfluorinated compound extraction solution (MPFAC-C-ES) 2000 ng/mL            | Wellington laboratories |
| Mass labelled perfluorinated compound injection solution (MPFAC-C-IS) 2000 ng/mL             | Wellington laboratories |
| Perfluoro-1-octanesulfonamide (PFOSA), 50000 ng/mL                                           | Wellington laboratories |
| N-ethylperfluoro-1-octylsulfonamide (N-EtFOSA), 50000 ng/mL                                  | Wellington laboratories |
| Sodium 1H, 1H, 2H, 2H-perfluorodecane sulfonate (>98%) (8:2 FTS) 50000 ng/mL                 | Wellington laboratories |
| Na 1H, 1H, 2H, 2H-perfluorododecane sulfonate (>98%) (10:2 FTS) 50000 ng/mL                  | Wellington laboratories |
| Perfluorooctylphosphoric acid (>98%) (PFOPA) 50000 ng/mL                                     | Wellington laboratories |
| 2-Perfluorooctyl ethanoic acid (FOEA) 50000 ng/mL                                            | Wellington laboratories |
| Na 8-Chloroperfluoro-1-octansulfonate (8Cl PFOS) 50000 ng/mL                                 | Wellington laboratories |
| Perfluoro-1-octanesulfonamidoacetic acid (FOSAA) 50000 ng/mL                                 | Wellington laboratories |
| 2-(N-methylperfluoro1octanensulfonamido)-ethanol (>98%) (N-MetFOSE) 50000 ng/mL              | Wellington laboratories |
| 2-(N-ethylperfluoro1octanensulfonamido)-ethanol (>98%) (N-EtFOSE) 50000 ng/mL                | Wellington laboratories |
| 2,3,3,3-tetrafluoro-2-(heptafluoropropoxy) propanoic acid (GenX) 50000 ng/mL                 | Wellington laboratories |
| Na dodecafluoro-3H-4,8-dioxannonanoate (NADONA) 50000 ng/mL                                  | Wellington laboratories |
| Analytical column for target analysis, Brownlee, SPP C 18, 3 x 100 mm                        | Perkin Elmer            |
| Guard column for target analysis, Brownlee, SPP C 18, 3 x 5 mm                               | Perkin Elmer            |
| Analytical column for ion chromatography, RPR X 100 (10 $\mu$ m, 4.6 x 250mm)                | Hamilton                |
| Anion exchange coulmn IonPac AS11-HC (4 $\mu$ m, 2 x 250 mm)                                 | Thermo Scientific       |
| Guard coulmn for ion chromatograpy, Dionex IonPac AS11-AG (4 $\mu$ m, 2 x 50 mm)             | Thermo Scientific       |
| Pyrolytically coated graphite tubes with PIN                                                 | Analitic Jena           |
| Sonication bath, Transsonic 700/H                                                            | Elma                    |
| Centrifuge, Rotina 420R                                                                      | Hettich Zentrifugen     |
| Eppendorf centrifuge, CD2012 plus                                                            | Phoenix Instrument      |



|                                               |                       |
|-----------------------------------------------|-----------------------|
| SPE cartridges Oasis WAX, 150mg, 30µm         | Waters                |
| Eppendorf vials                               | Fisher Scientific     |
| Centrifuge tubes (15 and 50mL)                | VWR                   |
| Beakers (100mL)                               | Fisher Scientific     |
| Measuring cylinders (10 - 100mL)              | Fisher Scientific     |
| SPE vacuum manifold Visiprep                  | Supelco Analytical    |
| Glass pastour pipettes                        | Fisher Scientific     |
| Glass TOC vials (40mL) with PP caps           | Bartelt               |
| Glass HPLC vials (1.5mL short thread vials)   | Agilent tenchnologies |
| Glass conical inserts (250µL conical inserts) | Bartelt               |
| DS bottles (50mL - 1L)                        | Fisher Scientific     |

| Instruments                                                                                | Manufacturer                  |
|--------------------------------------------------------------------------------------------|-------------------------------|
| Horizontal furnace (HF2100)                                                                | Mitsubishi Chemical Analytech |
| Gas absorption unit (GA211)                                                                | Mitsubishi Chemical Analytech |
| Ion chromatogram for EOF Dionex Aquion RFIC                                                | Thermo Scientific             |
| Ion chromatogram for total F ICS-5000                                                      | Thermo Scientific             |
| High performance liquid chromatography, Infinity 1200                                      | Agilent Technologies          |
| Electrospray tandem mass spectrometer, ESI MS/MS 6545                                      | Agilent Technologies          |
| High resolution graphite furnace molecular absorption spectrometer, HR-GF-MAS, ContrAA 700 | Analytic Jena                 |

Table S3a. Collected snow samples from Teichalm TA samples), Klippitztörl (KP samples), Lachtal (LTSN samples) and Schladming (SD samples).

| <b>Sample</b> | <b>Description</b>                                                                               | <b>Location coordinates</b> | <b>Location</b> |
|---------------|--------------------------------------------------------------------------------------------------|-----------------------------|-----------------|
| TA_SB         | Snow collected from away the skiing slopes.                                                      | 47.349851, 15.461375        | Teichalm        |
| TA_3          | Snow from the beginning of cross-country track.                                                  |                             |                 |
| TA_4          | Snow from downhill ski track in front of gates.                                                  |                             |                 |
| KP01          | Snow from lower exit to parking place after the hut at upper parking.                            | 46.945955, 14.699006        | Klippitztörl    |
| KP02          | Snow from the bottom of the 2-seater lift.                                                       | 46.943917, 14.691219        |                 |
| KP03          | Snow from the top of the 2-seater lift.                                                          | 46.951578, 14.684604        |                 |
| KP04          | Directly in front of hut (where people park their skis) at upper parking.                        | 46.945557, 14.698110        |                 |
| KP05          | Snow from middle exit to parking place after the hut at upper parking.                           | 46.945804, 14.698882        |                 |
| KP06          | Middle of ski slope (where people either stop to wait for others or go through) next to the hut. | 46.945731, 14.698075        |                 |
| LTSN00        | Snow collected from away the skiing slopes.                                                      | 47.252184, 14.347565        | Lachtal         |
| LTSN01        | Top of Lachtal chair lift.                                                                       | 47.263350, 14.354001        |                 |
| LTSN02        | Top of Schonberg lift.                                                                           | 47.265584, 14.375252        |                 |
| LTSN03        | Bottom of Schonberg lift.                                                                        | 47.259321, 14.366661        |                 |
| LTSN04        | Lachtal chair lift bottom (in front of gates).                                                   | 47.251584, 14.365663        |                 |
| LTSN05        | Zinken slope.                                                                                    | 47.268590, 14.344388        |                 |
| LTSN06        | bottom of Lachtal chair lift.                                                                    | 47.251584, 14.365663        |                 |
| LTSN07        | Langlauf loipe.                                                                                  | 47.253058, 14.350012        |                 |
| HS00          | Heshütte in Gesäuse.                                                                             | 47.555958, 14.660596        | Gesäuse         |
| SD01          | Bottom of Hauser Kaibling gondola lift on 21. March 2022.                                        | 47.411519, 13.778071        | Schladming      |
| SD02          | Bottom of Hauser Kaibling gondola lift on 22. March 2022.                                        | 47.411519, 13.778071        |                 |
| SD03          | Bottom of Planai I. gondola lift on 22. March 2022.                                              | 47.392544, 13.693738        |                 |
| SD04          | Middle of red 37 slope.                                                                          | 47.387051, 13.675479        |                 |
| SD05          | Top area of Rorhmoos I chairlift.                                                                | 47.383858, 13.668667        |                 |

Table S3b. Collected soil samples from Lachtal (LT), Klippitztörl (KPS) and Schladming (SDS).

| Sample  | Description                                                                       | Location coordinates                                                              | Location         |                      |  |
|---------|-----------------------------------------------------------------------------------|-----------------------------------------------------------------------------------|------------------|----------------------|--|
| LT1S    |                                                                                   |                                                                                   |                  |                      |  |
| LT2S    |                                                                                   |                                                                                   |                  |                      |  |
| LT3S    |                                                                                   |                                                                                   |                  |                      |  |
| LT4S    |                                                                                   |                                                                                   |                  |                      |  |
| LT5S    | Samples taken at 1 m distance                                                     |                                                                                   |                  |                      |  |
| LT6S    |                                                                                   |                                                                                   |                  |                      |  |
| LT7S    |                                                                                   |                                                                                   |                  |                      |  |
| LT8S    |                                                                                   |                                                                                   |                  |                      |  |
| LT9S    |                                                                                   |                                                                                   |                  |                      |  |
| LT10S   |                                                                                   |                                                                                   |                  |                      |  |
| LT11S   |                                                                                   |                                                                                   | 47.1506, 14.2104 | Lachtal,<br>transect |  |
| LT12S   |                                                                                   | 1m distance from 10S, 2m distance from 12S, and<br>from this onwards, 2m distance |                  |                      |  |
| LT13S   |                                                                                   |                                                                                   |                  |                      |  |
| LT14S   |                                                                                   |                                                                                   |                  |                      |  |
| LT15S   |                                                                                   |                                                                                   |                  |                      |  |
| LT16S   |                                                                                   |                                                                                   |                  |                      |  |
| LT17S   | 2m distance from 15S, 3m distance from 17S, and<br>from this onwards, 3m distance |                                                                                   |                  |                      |  |
| LT18S   |                                                                                   |                                                                                   |                  |                      |  |
| LT19S   |                                                                                   |                                                                                   |                  |                      |  |
| LT20S   | Last sample. 7m to the stream                                                     |                                                                                   |                  |                      |  |
| KPS BS  | Soil from playground next to 2-seater lift.                                       | 46.943992, 14.692236                                                              |                  |                      |  |
| KPS02   | Soil from the bottom of the 2-seater lift                                         | 46.943917, 14.691219                                                              |                  |                      |  |
| KPS03   | Soil from the top of the 2-seater lift                                            | 46.951578, 14.684604                                                              | Klippitztörl     |                      |  |
| KPS04   | Directly in front of hut (where people park their<br>skiis).                      | 46.945557, 14.698110                                                              |                  |                      |  |
| KPS06   | Middle of ski slope next to the hut                                               | 46.945731, 14.698075                                                              |                  |                      |  |
| SDS01   | Bottom of Hauser Kaibling gondola                                                 | 47.411519, 13.778071                                                              |                  |                      |  |
| SDS03   | Bottom of planet planai gondola                                                   | 47.392544, 13.693738                                                              |                  |                      |  |
| SDS05   | From the sport shop at Hochwurzen                                                 | 47.383858, 13.668667                                                              | Schladming       |                      |  |
| SDS05-B | Top of DSL Rohrmoos I lift                                                        | 47.383858, 13.668667                                                              |                  |                      |  |
| SDS BS  | Steirischer bodensee parking area from the burn                                   | 47.380759, 13.826371                                                              |                  |                      |  |

Table 3c. List of purchased ski waxes.

| Name                                              | Code | Manufacturer | Made in     |
|---------------------------------------------------|------|--------------|-------------|
| Toko all in one hot wax universal Non Fluoro      | 1    | TOKO         | Switzerland |
| Contour                                           | 2    | Contour      | EU          |
| Toko hot wax high fluoro (HF) (art. No.: 5501023) | 3    | TOKO         | Switzerland |
| Moly Fluor wax (MB77-60)                          | 4    | SWIX         | Norway      |
| Ceranovax LF7 (LF07X-6)                           | 5    | SWIX         | Norway      |
| Ceranovax HF7 (HF07X-4)                           | 6    | SWIX         | Norway      |

Table S4a. List of monitored transitions and MS parameters.

| Compound Name | Precursor Ion | Product Ion | Ret Time (min) | Fragmentor | Collision Energy | Cell Accelerator Voltage | Polarity |
|---------------|---------------|-------------|----------------|------------|------------------|--------------------------|----------|
| 10_2FTS       | 627           | 607         | 14.1           | 196        | 52               | 4                        | Negative |
| 10_2FTS       | 627           | 81          | 14.1           | 196        | 92               | 4                        | Negative |
| 8_2FTS        | 527           | 507         | 11.4           | 176        | 48               | 7                        | Negative |
| 8_2FTS        | 527           | 81          | 11.4           | 176        | 80               | 7                        | Negative |
| 8Cl-PFOS      | 515           | 99          | 13.3           | 202        | 104              | 4                        | Negative |
| d7-N-MetFOSE  | 623           | 59          | 21.2           | 106        | 48               | 4                        | Negative |
| FOEA          | 477           | 393         | 10.2           | 96         | 56               | 4                        | Negative |
| FOSAA         | 556           | 498         | 11.6           | 194        | 44               | 6                        | Negative |
| FOSAA         | 556           | 419         | 11.6           | 194        | 52               | 6                        | Negative |
| GenX          | 285           | 169         | 6.1            | 70         | 12               | 5                        | Negative |
| GenX          | 285           | 119         | 6.1            | 70         | 84               | 8                        | Negative |
| M2PFOA        | 415           | 370         | 9.2            | 70         | 16               | 4                        | Negative |
| M2PFtEDA      | 715           | 670         | 17.5           | 122        | 36               | 4                        | Negative |
| M3PFBA        | 216           | 172         | 1.9            | 68         | 12               | 4                        | Negative |
| M3PFBS        | 302           | 80          | 5.6            | 162        | 88               | 4                        | Negative |
| M3PFHxS       | 402           | 80          | 9.8            | 176        | 108              | 4                        | Negative |
| M4PFHpA       | 367           | 322         | 7.5            | 74         | 20               | 4                        | Negative |
| M5PFHxA       | 318           | 273         | 5.3            | 68         | 28               | 4                        | Negative |
| M5PFPA        | 268           | 223         | 2.9            | 70         | 12               | 4                        | Negative |
| M6PFDA        | 519           | 474         | 12.1           | 106        | 16               | 6                        | Negative |
| M7PFuDA       | 570           | 525         | 13.4           | 82         | 24               | 5                        | Negative |
| M8PFOA        | 421           | 376         | 9.2            | 68         | 8                | 4                        | Negative |
| M8PFOS        | 507           | 80          | 12.9           | 196        | 100              | 6                        | Negative |
| M9PFNA        | 472           | 427         | 10.7           | 84         | 12               | 6                        | Negative |
| MPFBA         | 217           | 172         | 1.9            | 64         | 8                | 4                        | Negative |
| MPFDA         | 515           | 470         | 12.1           | 72         | 20               | 6                        | Negative |
| MPFdDA        | 615           | 570         | 14.8           | 118        | 24               | 6                        | Negative |
| MPFOS         | 503           | 80          | 12.9           | 204        | 112              | 6                        | Negative |
| NaDONA        | 377           | 251         | 8.1            | 72         | 20               | 6                        | Negative |
| NaDONA        | 377           | 85          | 8.1            | 72         | 72               | 6                        | Negative |
| N-EtFOSA      | 526           | 219         | 20.9           | 168        | 72               | 5                        | Negative |
| N-EtFOSA      | 526           | 169         | 20.9           | 168        | 108              | 5                        | Negative |
| N-EtFOSE      | 630           | 59          | 20.8           | 102        | 36               | 5                        | Negative |
| N-MetFOSE     | 616           | 59          | 20.4           | 106        | 48               | 4                        | Negative |
| PFBA          | 213           | 19          | 1.9            | 72         | 64               | 4                        | Negative |
| PFBA          | 213           | 169         | 1.9            | 72         | 12               | 4                        | Negative |
| PFBS          | 299           | 99          | 5.6            | 158        | 88               | 4                        | Negative |
| PFBS          | 299           | 80          | 5.6            | 158        | 112              | 4                        | Negative |
| PFDA          | 513           | 469         | 12.1           | 92         | 20               | 6                        | Negative |
| PFDA          | 513           | 219         | 12.1           | 92         | 24               | 6                        | Negative |
| PFdDA         | 613           | 569         | 14.8           | 104        | 24               | 6                        | Negative |
| PFdDA         | 613           | 269         | 14.8           | 104        | 52               | 6                        | Negative |

Table S4a. Continued.

| Compound Name | Precursor Ion | Product Ion | Ret Time (min) | Fragmentor | Collision Energy | Cell Accelerator Voltage | Polarity |
|---------------|---------------|-------------|----------------|------------|------------------|--------------------------|----------|
| PFdDS         | 699           | 99          | 18.3           | 208        | 112              | 4                        | Negative |
| PFdDS         | 699           | 80          | 18.3           | 208        | 116              | 4                        | Negative |
| PFDS          | 599           | 99          | 15.7           | 214        | 116              | 4                        | Negative |
| PFDS          | 599           | 80          | 15.7           | 214        | 104              | 4                        | Negative |
| PFHpA         | 363           | 319         | 7.5            | 74         | 16               | 4                        | Negative |
| PFHpA         | 363           | 169         | 7.5            | 74         | 28               | 4                        | Negative |
| PFHpS         | 449           | 99          | 11.4           | 200        | 120              | 4                        | Negative |
| PFHpS         | 449           | 80          | 11.4           | 200        | 92               | 4                        | Negative |
| PFHxA         | 313           | 269         | 5.3            | 72         | 12               | 4                        | Negative |
| PFHxA         | 313           | 119         | 5.3            | 72         | 88               | 4                        | Negative |
| PFhxDA        | 813           | 769         | 19.1           | 136        | 40               | 4                        | Negative |
| PFhxDA        | 813           | 169         | 19.1           | 136        | 64               | 4                        | Negative |
| PFHxS         | 399           | 99          | 9.8            | 186        | 76               | 4                        | Negative |
| PFHxS         | 399           | 80          | 9.8            | 186        | 108              | 4                        | Negative |
| PFNA          | 463           | 419         | 10.7           | 84         | 16               | 6                        | Negative |
| PFNA          | 463           | 219         | 10.7           | 84         | 28               | 6                        | Negative |
| PFNS          | 549           | 99          | 14.2           | 214        | 120              | 5                        | Negative |
| PFNS          | 549           | 80          | 14.2           | 214        | 108              | 5                        | Negative |
| PFOA          | 413           | 369         | 9.1            | 76         | 16               | 4                        | Negative |
| PFOA          | 413           | 169         | 9.1            | 76         | 28               | 4                        | Negative |
| PFoDA         | 913           | 869         | 20             | 142        | 52               | 4                        | Negative |
| PFoDA         | 913           | 169         | 20             | 142        | 96               | 4                        | Negative |
| PFOPA         | 499           | 79          | 18.2           | 164        | 108              | 5                        | Negative |
| PFOS          | 499           | 99          | 12.9           | 208        | 104              | 6                        | Negative |
| PFOS          | 499           | 80          | 12.9           | 208        | 108              | 6                        | Negative |
| PFOSA         | 498           | 78          | 18.2           | 174        | 92               | 5                        | Negative |
| PFPA          | 263           | 219         | 2.9            | 56         | 8                | 4                        | Negative |
| PFPS          | 349           | 99          | 7.9            | 164        | 84               | 4                        | Negative |
| PFPS          | 349           | 80          | 7.9            | 164        | 108              | 4                        | Negative |
| PFteDA        | 713           | 669         | 17.5           | 94         | 32               | 4                        | Negative |
| PFteDA        | 713           | 169         | 17.5           | 94         | 116              | 4                        | Negative |
| PFtrDA        | 663           | 619         | 16.2           | 104        | 32               | 4                        | Negative |
| PFtrDA        | 663           | 169         | 16.2           | 104        | 68               | 4                        | Negative |
| PFuDA         | 563           | 519         | 13.4           | 52         | 16               | 5                        | Negative |
| PFuDA         | 563           | 169         | 13.4           | 52         | 92               | 5                        | Negative |

Table S4b. LC method

| Time (min) | A (%) | B (%) |
|------------|-------|-------|
| 0.0        | 75    | 25    |
| 1.0        | 75    | 25    |
| 15.0       | 40    | 60    |
| 19.0       | 0     | 100   |
| 24.0       | 0     | 100   |
| 24.1       | 75    | 25    |
| 28.0       | 75    | 25    |

Table S5. Concentration of target PFAS in soil and wax samples in ng/g and snowmelt in ng/L.

| Origin       | Sample name | PFBA  | PFPA | PFHxA | PFHpA | PFOA | PFNA | PFDA | PFuDA | PFdDA | PFTrDA | PFteDA | PFHxD A | PFoDA | PFBS | PFPS | PFHxS | PFHpS | PFOS |
|--------------|-------------|-------|------|-------|-------|------|------|------|-------|-------|--------|--------|---------|-------|------|------|-------|-------|------|
| Lachtal soil | MB_1        | <LOD  | <LOQ | <LOD  | <LOD  | <LOD | <LOD | <LOD | <LOD  | <LOQ  | <LOD   | <LOD   | <LOD    | <LOD  | <LOQ | <LOD | <LOD  | <LOD  | <LOQ |
|              | LT1S        | 0.27  | <LOQ | <LOQ  | <LOQ  | <LOQ | 0.49 | 0.23 | 0.19  | <LOQ  | <LOD   | <LOD   | <LOD    | <LOD  | <LOD | <LOD | <LOD  | <LOD  | <LOQ |
|              | LT2S        | 0.22  | <LOQ | <LOQ  | <LOQ  | <LOQ | 0.59 | 0.68 | 0.46  | <LOQ  | <LOD   | <LOD   | <LOD    | <LOD  | <LOD | <LOD | <LOD  | <LOD  | <LOQ |
|              | LT3S        | <LOQ  | <LOD | <LOD  | <LOQ  | <LOQ | 0.69 | 0.64 | 0.49  | 0.18  | <LOD   | <LOD   | <LOD    | <LOD  | <LOD | <LOD | <LOD  | <LOD  | <LOQ |
|              | LT4S        | 0.40  | <LOQ | <LOQ  | 0.35  | <LOQ | 0.83 | 0.72 | 0.58  | 0.18  | <LOD   | <LOD   | <LOD    | <LOD  | <LOD | <LOD | <LOD  | <LOD  | <LOQ |
|              | LT5S        | <LOD  | <LOD | <LOD  | <LOD  | <LOD | 0.23 | 0.19 | 0.12  | <LOD  | <LOD   | <LOD   | <LOD    | <LOD  | <LOD | <LOD | <LOD  | <LOD  | <LOD |
|              | LT6S        | <LOQ  | <LOD | <LOQ  | <LOQ  | <LOQ | 0.52 | 0.43 | 0.38  | <LOQ  | <LOD   | <LOD   | <LOD    | <LOD  | <LOD | <LOD | <LOD  | <LOD  | <LOQ |
|              | LT7S        | <LOQ  | <LOD | <LOD  | <LOQ  | <LOQ | 0.33 | 0.18 | 0.14  | <LOD  | <LOD   | <LOD   | <LOD    | <LOD  | <LOD | <LOD | <LOD  | <LOD  | <LOQ |
|              | MB_2        | <LOD  | <LOD | <LOD  | <LOD  | <LOQ | <LOD | <LOD | <LOD  | <LOD  | <LOD   | <LOD   | <LOD    | <LOD  | <LOD | <LOQ | <LOD  | <LOD  | <LOD |
|              | LT8S        | 0.31  | <LOQ | <LOQ  | 0.33  | <LOQ | 0.52 | 0.33 | 0.33  | <LOQ  | <LOD   | <LOD   | <LOD    | <LOD  | <LOD | <LOD | <LOD  | <LOD  | <LOQ |
|              | LT9S        | <LOD  | <LOD | <LOD  | <LOQ  | <LOQ | 0.35 | 0.22 | 0.25  | <LOQ  | <LOD   | <LOD   | <LOD    | <LOD  | <LOD | <LOD | <LOD  | <LOD  | <LOQ |
|              | LT10S       | 0.36  | <LOQ | <LOQ  | 0.36  | <LOQ | 0.61 | 0.35 | 0.32  | <LOQ  | <LOD   | <LOD   | <LOD    | <LOD  | <LOD | <LOD | <LOD  | <LOD  | <LOQ |
|              | LT11S_1     | <LOD  | <LOD | <LOQ  | <LOQ  | <LOQ | 0.38 | 0.27 | 0.22  | <LOD  | <LOD   | <LOD   | <LOD    | <LOD  | <LOD | <LOD | <LOD  | <LOD  | <LOQ |
|              | LT11S_2     | <LOQ  | <LOD | <LOD  | <LOQ  | 1.04 | 0.49 | 0.32 | 0.30  | <LOQ  | <LOD   | <LOD   | <LOD    | <LOD  | <LOD | <LOD | <LOD  | <LOD  | <LOQ |
|              | LT11S_3     | <LOD  | <LOD | <LOD  | <LOD  | <LOD | 0.41 | 0.26 | 0.23  | <LOQ  | <LOD   | <LOD   | <LOD    | <LOD  | <LOD | <LOD | <LOD  | <LOD  | <LOQ |
|              | LT12S       | <LOQ  | <LOD | <LOQ  | 0.34  | <LOQ | 0.75 | 0.31 | 0.26  | <LOD  | <LOD   | <LOD   | <LOD    | <LOD  | <LOD | <LOD | <LOD  | <LOD  | <LOQ |
|              | MB_3        | <LOQ  | <LOD | <LOD  | <LOD  | <LOQ | <LOD | <LOD | <LOD  | <LOD  | <LOD   | <LOD   | <LOD    | <LOD  | <LOD | <LOQ | <LOD  | <LOD  | <LOD |
|              | LT13S       | 1.0   | <LOQ | <LOD  | <LOQ  | <LOQ | 0.42 | 0.29 | 0.32  | <LOQ  | <LOQ   | <LOD   | <LOD    | <LOD  | <LOD | <LOD | <LOD  | <LOQ  | 0.46 |
| LT14S        | 1.6         | 0.207 | <LOQ | 0.57  | <LOQ  | 0.90 | 0.63 | 0.67 | 0.21  | <LOQ  | <LOD   | <LOD   | <LOD    | <LOD  | <LOD | <LOD | <LOD  | 0.60  |      |
| LT15S        | <LOQ        | <LOQ  | <LOD | <LOQ  | <LOQ  | 0.63 | <LOQ | 0.31 | <LOQ  | <LOD  | <LOD   | <LOD   | <LOD    | <LOD  | <LOD | <LOD | <LOD  | <LOQ  |      |
| LT16S        | <LOQ        | <LOQ  | <LOD | <LOQ  | <LOQ  | 0.77 | 0.69 | 0.72 | 0.23  | <LOQ  | <LOD   | <LOD   | <LOD    | <LOD  | <LOD | <LOD | <LOD  | <LOQ  |      |
| LT17S        | <LOQ        | <LOQ  | <LOD | <LOQ  | <LOQ  | 0.72 | 0.36 | 0.28 | <LOD  | <LOQ  | <LOD   | <LOD   | <LOD    | <LOD  | <LOD | <LOD | <LOD  | <LOQ  |      |
| LT18S        | <LOQ        | <LOQ  | <LOQ | <LOQ  | <LOQ  | 0.37 | 0.29 | 0.24 | <LOQ  | <LOD  | <LOD   | <LOD   | <LOD    | <LOD  | <LOD | <LOD | <LOD  | <LOD  |      |



Table S5. Concentration of target PFAS in soil and wax samples in ng/g and snowmelt in ng/L.

| Origin                             | Sample name                   | PFBA | PFPA | PFHxA | PFHpA | PFOA | PFNA | PFDA | PFuDA | PFdDA | PFtrDA | PFteDA | PFHxD A | PFoDA | PFBS | PFPS | PFHxS | PFHpS | PFOS |
|------------------------------------|-------------------------------|------|------|-------|-------|------|------|------|-------|-------|--------|--------|---------|-------|------|------|-------|-------|------|
| Lachtal soil                       | LT19S                         | <LOD | <LOD | <LOD  | <LOQ  | <LOQ | 0.29 | 0.19 | 0.17  | <LOD  | <LOD   | <LOD   | <LOD    | <LOD  | <LOD | <LOD | <LOD  | <LOD  | <LOD |
|                                    | LT20S_1                       | <LOQ | <LOQ | <LOD  | <LOQ  | <LOQ | 0.32 | 0.17 | 0.16  | <LOD  | <LOD   | <LOD   | <LOD    | <LOD  | <LOD | <LOD | <LOD  | <LOD  | <LOD |
|                                    | LT20S_2                       | <LOQ | <LOQ | <LOQ  | <LOQ  | <LOQ | 0.30 | 0.18 | 0.14  | <LOD  | <LOD   | <LOD   | <LOD    | <LOD  | <LOD | <LOD | <LOD  | <LOD  | <LOD |
| Klippitztorf soil                  | KPS soil from non-skiing area | <LOQ | <LOD | <LOD  | <LOD  | <LOD | <LOQ | <LOD | <LOD  | <LOD  | 0.070  | <LOQ   | <LOD    | <LOQ  | <LOD | <LOD | <LOD  | <LOD  | 0.95 |
|                                    | KPS02                         | <LOD | <LOD | <LOD  | <LOD  | <LOD | <LOQ | 0.86 | <LOQ  | <LOD  | 0.077  | 0.11   | <LOQ    | <LOQ  | <LOD | <LOD | <LOD  | <LOD  | 2.9  |
|                                    | KPS03                         | <LOD | <LOD | <LOD  | <LOD  | <LOQ | 0.37 | 1.18 | <LOQ  | <LOQ  | 0.17   | 0.21   | <LOD    | <LOQ  | <LOD | <LOD | <LOD  | <LOD  | 0.85 |
|                                    | KPS04-1                       | <LOD | <LOD | <LOD  | <LOD  | <LOQ | <LOD | <LOD | <LOD  | <LOD  | <LOQ   | <LOQ   | <LOD    | <LOQ  | <LOD | <LOD | <LOD  | <LOD  | <LOQ |
|                                    | KPS04-2                       | <LOD | <LOD | <LOD  | <LOD  | <LOQ | <LOD | <LOD | <LOD  | <LOD  | <LOQ   | <LOQ   | <LOD    | <LOQ  | <LOD | <LOD | <LOD  | <LOD  | <LOQ |
|                                    | KPS04-3                       | <LOD | <LOD | <LOD  | <LOD  | <LOQ | <LOD | <LOD | <LOD  | <LOD  | <LOQ   | <LOQ   | <LOD    | <LOQ  | <LOD | <LOD | <LOD  | <LOD  | <LOQ |
| KPS06                              | <LOD                          | <LOD | <LOD | <LOD  | <LOQ  | <LOQ | <LOD | <LOD | <LOD  | <LOQ  | <LOQ   | <LOD   | <LOQ    | <LOD  | <LOD | <LOD | <LOD  | <LOQ  |      |
| Teichalm and Klippitztorf snowmelt | KP MB                         | <LOD | <LOD | <LOD  | <LOD  | 15   | <LOD | <LOD | <LOD  | <LOD  | <LOD   | <LOD   | <LOD    | <LOQ  | <LOD | <LOD | <LOD  | <LOD  | <LOD |
|                                    | TASB                          | <LOD | <LOD | <LOD  | <LOD  | <LOD | <LOD | <LOD | <LOD  | <LOD  | <LOD   | <LOD   | <LOD    | <LOD  | <LOD | <LOD | <LOD  | <LOD  | <LOD |
|                                    | KP01                          | <LOQ | <LOQ | 10    | <LOQ  | <LOQ | <LOQ | <LOQ | <LOD  | <LOD  | <LOD   | <LOD   | <LOD    | <LOD  | <LOD | <LOD | <LOD  | <LOD  | <LOQ |
|                                    | KP02                          | <LOQ | <LOD | 8.8   | <LOQ  | <LOQ | <LOQ | 20   | <LOQ  | <LOQ  | <LOQ   | <LOD   | <LOD    | <LOD  | <LOD | <LOD | <LOD  | <LOD  | 2.3  |
|                                    | KP03                          | 113  | <LOD | 10    | <LOQ  | <LOQ | <LOQ | 16   | <LOQ  | <LOQ  | <LOD   | <LOD   | <LOD    | <LOD  | <LOD | <LOD | <LOD  | <LOD  | 3.3  |
|                                    | KP04                          | 51   | <LOD | 10    | <LOD  | <LOD | <LOQ | <LOQ | <LOD  | <LOD  | <LOD   | <LOD   | <LOD    | <LOD  | <LOD | <LOD | <LOD  | <LOD  | <LOQ |
|                                    | KP05                          | 40   | <LOD | 9.2   | <LOQ  | <LOQ | <LOQ | <LOQ | <LOD  | <LOD  | <LOD   | <LOD   | <LOD    | <LOD  | <LOD | <LOD | <LOD  | <LOD  | <LOQ |
|                                    | KP06                          | 69   | <LOD | <LOQ  | <LOD  | <LOD | <LOD | <LOD | <LOD  | <LOD  | <LOD   | <LOD   | <LOD    | <LOD  | <LOD | <LOD | <LOD  | <LOD  | <LOD |
|                                    | TA03                          | <LOQ | 6.7  | 61    | <LOQ  | <LOQ | 16   | 24   | <LOQ  | <LOQ  | <LOD   | <LOD   | <LOD    | <LOD  | <LOD | <LOD | <LOD  | <LOD  | 2.1  |
| TA04                               | 29                            | <LOQ | 23   | 5.0   | <LOQ  | <LOQ | 12   | <LOD | <LOD  | <LOD  | <LOD   | <LOD   | <LOD    | <LOD  | <LOD | <LOD | <LOD  | <LOD  |      |

Table S5. Concentration of target PFAS in soil and wax samples in ng/g and snowmelt in ng/L.

| Origin              | Sample name | PFBA | PFPA | PFHxA | PFHpA | PFOA | PFNA | PFDA | PFuDA | PFdDA | PFtrDA | PFteDA | PFhxD A | PFoDA | PFBS | PFPS | PFHxS | PFHpS | PFOS |
|---------------------|-------------|------|------|-------|-------|------|------|------|-------|-------|--------|--------|---------|-------|------|------|-------|-------|------|
| Lachtal snowmelt    | LTSN MB     | <LOD | <LOD | <LOD  | <LOD  | 16   | <LOD | <LOD | <LOD  | <LOD  | <LOD   | <LOD   | <LOD    | <LOD  | <LOD | <LOD | <LOD  | <LOD  | <LOD |
|                     | LTSN00      | <LOQ | <LOD | <LOD  | <LOD  | <LOQ | <LOD | <LOD | <LOD  | <LOD  | <LOD   | <LOD   | <LOD    | <LOD  | <LOD | <LOD | <LOD  | <LOD  | <LOD |
|                     | LTSN01      | <LOD | <LOD | <LOD  | <LOD  | <LOQ | <LOD | <LOD | <LOD  | <LOD  | <LOD   | <LOD   | <LOD    | <LOD  | <LOD | <LOD | <LOD  | <LOD  | <LOD |
|                     | LTSN02      | <LOQ | <LOD | <LOQ  | <LOD  | <LOQ | <LOD | <LOQ | <LOD  | <LOD  | <LOD   | <LOD   | <LOD    | <LOD  | <LOD | <LOD | <LOD  | <LOD  | <LOD |
|                     | LTSN03      | <LOD | <LOD | <LOD  | <LOD  | <LOQ | <LOD | <LOD | <LOD  | <LOD  | <LOD   | <LOD   | <LOD    | <LOD  | <LOD | <LOD | <LOD  | <LOD  | <LOD |
|                     | LTSN04      | <LOQ | <LOD | <LOQ  | <LOD  | <LOQ | <LOD | <LOQ | <LOD  | <LOD  | <LOD   | <LOD   | <LOD    | <LOD  | <LOD | <LOD | <LOD  | <LOD  | <LOD |
|                     | LTSN05      | <LOD | <LOD | <LOD  | <LOD  | <LOQ | <LOD | <LOD | <LOD  | <LOD  | <LOD   | <LOD   | <LOD    | <LOD  | <LOD | <LOD | <LOD  | <LOD  | <LOD |
|                     | LTSN06      | <LOQ | <LOD | <LOQ  | <LOQ  | <LOQ | <LOD | <LOQ | <LOQ  | <LOQ  | <LOD   | <LOD   | <LOD    | <LOD  | <LOD | <LOD | <LOD  | <LOD  | <LOD |
| LTSN07              | <LOQ        | <LOD | <LOD | <LOD  | <LOQ  | <LOD | <LOD | <LOD | <LOD  | <LOD  | <LOD   | <LOD   | <LOD    | <LOD  | <LOD | <LOD | <LOD  | <LOD  |      |
| Schladming snowmelt | SD MB       | <LOD | <LOD | <LOD  | <LOD  | <LOD | <LOD | <LOD | <LOD  | <LOD  | <LOD   | <LOD   | <LOD    | <LOD  | <LOD | <LOD | <LOD  | <LOD  | <LOD |
|                     | SD01        | 2.0  | 10   | 28    | 3.4   | <LOD | 3.1  | <LOD | <LOD  | 0.3   | <LOD   | <LOD   | <LOD    | <LOD  | <LOD | <LOD | <LOD  | <LOD  | <LOD |
|                     | SD02        | <LOD | <LOD | <LOD  | <LOD  | <LOD | <LOD | <LOD | <LOD  | <LOD  | <LOD   | <LOD   | <LOD    | <LOD  | <LOD | <LOD | <LOD  | <LOD  | <LOD |
|                     | SD03        | <LOD | <LOD | 1.7   | <LOD  | <LOD | <LOD | <LOD | <LOD  | <LOD  | <LOD   | <LOD   | <LOD    | <LOD  | <LOD | <LOD | <LOD  | <LOD  | <LOD |
|                     | SD04        | <LOD | <LOD | <LOD  | <LOD  | <LOD | <LOD | <LOD | <LOD  | <LOD  | <LOD   | <LOD   | <LOD    | <LOD  | <LOD | <LOD | <LOD  | <LOD  | <LOD |
|                     | SD05        | <LOD | 5.9  | 13    | <LOD  | <LOD | 6.4  | <LOD | <LOD  | <LOD  | <LOD   | <LOD   | <LOD    | <LOD  | <LOD | <LOD | <LOD  | <LOD  | <LOD |
|                     | HS00        | <LOD | <LOD | <LOD  | <LOD  | <LOD | <LOD | <LOD | <LOD  | <LOD  | <LOD   | <LOD   | <LOD    | <LOD  | <LOD | <LOD | <LOD  | <LOD  | <LOD |

Table S5. Concentration of target PFAS in soil and wax samples in ng/g and snowmelt in ng/L.

| Origin  | Sample name | PFBA | PFPA | PFHxA | PFHpA | PFOA | PFNA | PFDA | PFuDA | PFdDA | PFtrDA | PFteDA | PFHxD A | PFoDA | PFBS | PFPS | PFHxS | PFHpS | PFOS |      |
|---------|-------------|------|------|-------|-------|------|------|------|-------|-------|--------|--------|---------|-------|------|------|-------|-------|------|------|
| Ski wax | MB_Wax1     | <LOD | <LOD | <LOD  | <LOD  | <LOD | <LOD | <LOD | <LOD  | <LOD  | <LOD   | <LOD   | <LOD    | <LOD  | <LOD | <LOD | <LOD  | <LOD  | <LOD |      |
|         | MB_Wax2     | <LOD | <LOD | <LOD  | <LOD  | <LOD | <LOD | <LOD | <LOD  | <LOD  | <LOD   | <LOD   | <LOD    | <LOD  | <LOD | <LOD | <LOD  | <LOD  | <LOD |      |
|         | MB_Wax3     | <LOD | <LOD | <LOD  | <LOD  | <LOD | <LOD | <LOD | <LOD  | <LOD  | <LOD   | <LOD   | <LOD    | <LOD  | <LOD | <LOD | <LOD  | <LOD  | <LOD |      |
|         | Wax_1_1     | <LOD | <LOD | <LOD  | <LOD  | <LOD | <LOD | <LOD | <LOD  | <LOD  | <LOD   | <LOD   | <LOD    | <LOD  | <LOD | <LOD | <LOD  | <LOD  | <LOD | <LOD |
|         | Wax_1_2     | <LOD | <LOD | <LOD  | <LOD  | <LOD | <LOD | <LOD | <LOD  | <LOD  | <LOD   | <LOD   | <LOD    | <LOD  | <LOD | <LOD | <LOD  | <LOD  | <LOD | <LOD |
|         | Wax_1_3     | <LOD | <LOD | <LOD  | <LOD  | <LOD | <LOD | <LOD | <LOD  | <LOD  | <LOD   | <LOD   | <LOD    | <LOD  | <LOD | <LOD | <LOD  | <LOD  | <LOD | <LOD |
|         | Wax_2_1     | <LOD | <LOD | <LOD  | <LOD  | <LOD | <LOD | <LOD | <LOD  | <LOD  | <LOD   | <LOD   | <LOD    | <LOD  | <LOD | <LOD | <LOD  | <LOD  | <LOD | <LOD |
|         | Wax_2_2     | <LOD | <LOD | <LOD  | <LOD  | <LOD | <LOD | <LOD | <LOD  | <LOD  | <LOD   | <LOD   | <LOD    | <LOD  | <LOD | <LOD | <LOD  | <LOD  | <LOD | <LOD |
|         | Wax_2_3     | <LOD | <LOD | <LOD  | <LOD  | <LOD | <LOD | <LOD | <LOD  | <LOD  | <LOD   | <LOD   | <LOD    | <LOD  | <LOD | <LOD | <LOD  | <LOD  | <LOD | <LOD |
|         | Wax_3_1     | <LOD | <LOQ | <LOD  | <LOD  | <LOD | 25   | <LOD | <LOD  | <LOD  | <LOD   | <LOD   | <LOD    | <LOD  | <LOD | <LOD | <LOD  | <LOD  | <LOD | <LOD |
|         | Wax_3_2     | <LOD | <LOQ | <LOD  | <LOD  | <LOD | 24   | <LOD | <LOD  | <LOD  | <LOD   | <LOD   | <LOD    | <LOD  | <LOD | <LOD | <LOD  | <LOD  | <LOD | <LOD |
|         | Wax_3_3     | <LOQ | <LOQ | <LOD  | <LOQ  | <LOQ | 28   | <LOQ | <LOD  | <LOD  | <LOD   | <LOD   | <LOD    | <LOD  | <LOD | <LOD | <LOD  | <LOD  | <LOD | <LOD |
|         | Wax_4_1     | 5.6  | 12   | 175   | 518   | <LOD | 6.2  | 2.4  | 2.9   | <LOQ  | <LOQ   | 0.77   | <LOQ    | <LOD  | <LOD | <LOD | 148   | <LOD  | 3.1  |      |
|         | Wax_4_2     | <LOQ | 13   | 186   | 488   | <LOD | 5.7  | 2.1  | 2.6   | <LOQ  | 1.7    | 0.74   | <LOQ    | <LOD  | <LOD | <LOD | 77    | <LOD  | <LOQ |      |
|         | Wax_4_3     | <LOQ | <LOQ | 76    | 222   | <LOD | <LOQ | 0.88 | <LOQ  | <LOQ  | <LOQ   | <LOQ   | <LOD    | <LOD  | <LOD | <LOD | 24    | <LOD  | <LOQ |      |
|         | Wax_5_1     | <LOD | <LOD | <LOD  | <LOD  | <LOD | <LOD | <LOD | <LOD  | <LOD  | <LOD   | <LOD   | <LOD    | <LOD  | <LOD | <LOD | <LOD  | <LOD  | <LOD | <LOD |
|         | Wax_5_2     | <LOD | <LOD | <LOQ  | <LOD  | <LOD | <LOD | <LOD | <LOD  | <LOD  | <LOD   | <LOD   | <LOD    | <LOD  | <LOD | <LOD | <LOD  | <LOD  | <LOD | <LOD |
|         | Wax_5_3     | <LOD | <LOD | <LOD  | <LOD  | <LOD | <LOD | <LOD | <LOD  | <LOD  | <LOD   | <LOD   | <LOD    | <LOD  | <LOD | <LOD | <LOD  | <LOD  | <LOD | <LOD |
| Wax_6_1 | 37          | 41   | 173  | 82    | <LOD  | <LOD | <LOD | <LOD | <LOD  | <LOD  | <LOD   | <LOD   | <LOD    | <LOD  | <LOD | <LOD | <LOD  | <LOD  | <LOD |      |
| Wax_6_2 | 27          | 33   | 128  | <LOQ  | <LOD  | <LOD | <LOD | <LOD | <LOD  | <LOD  | <LOD   | <LOD   | <LOD    | <LOD  | <LOD | <LOD | <LOD  | <LOD  | <LOD |      |
| Wax_6_3 | 24          | 26   | 116  | <LOQ  | <LOD  | <LOD | <LOD | <LOD | <LOD  | <LOD  | <LOD   | <LOD   | <LOD    | <LOD  | <LOD | <LOD | <LOD  | <LOD  | <LOD |      |

Table S5. Concentration of target PFAS as well as the sum of target PFAS in soil and wax samples in ng/g (EOF in ng F/g) and snowmelt in ng/L (EOF ng F/L) and % of target PFAS in EOF.

| Origin       | Sample name | PFNS | PFDS | PFdDS | PFOSA | N-EtFOSA | 8Cl PFOS | PFOPA | GenX_2 | Nadon a | 8:2 FTS | 10:2 FTS | PFOSA A | N-MetFOSE | N-EtFOSE | FOEA | Σ PFAS | EOF  | %    |      |
|--------------|-------------|------|------|-------|-------|----------|----------|-------|--------|---------|---------|----------|---------|-----------|----------|------|--------|------|------|------|
| Lachtal soil | MB_1        | <LOD | <LOD | <LOD  | <LOQ  | <LOQ     | <LOD     | <LOD  | <LOQ   | <LOQ    | <LOD    | <LOD     | <LOD    | <LOD      | <LOQ     | <LOD | 0      | 309  | N.A. |      |
|              | LT1S        | <LOD | <LOD | <LOD  | <LOQ  | <LOD     | <LOD     | <LOD  | <LOD   | <LOD    | <LOD    | <LOD     | <LOD    | <LOD      | <LOD     | <LOD | <LOD   | 1.2  | 68   | 1.2  |
|              | LT2S        | <LOD | <LOD | <LOD  | <LOQ  | <LOD     | <LOD     | <LOD  | <LOD   | <LOD    | <LOD    | <LOD     | <LOD    | <LOD      | <LOD     | <LOD | <LOD   | 1.9  | 102  | 1.3  |
|              | LT3S        | <LOD | <LOD | <LOD  | <LOD  | <LOD     | <LOD     | <LOD  | <LOD   | <LOD    | <LOD    | <LOD     | <LOD    | <LOD      | <LOD     | <LOD | <LOD   | 2.0  | 143  | 0.99 |
|              | LT4S        | <LOD | <LOD | <LOD  | <LOQ  | <LOD     | <LOD     | <LOD  | <LOD   | <LOD    | <LOD    | <LOD     | <LOD    | <LOD      | <LOD     | <LOD | <LOD   | 3.1  | 283  | 0.75 |
|              | LT5S        | <LOD | <LOD | <LOD  | <LOD  | <LOD     | <LOD     | <LOD  | <LOD   | <LOD    | <LOD    | <LOD     | <LOD    | <LOD      | <LOD     | <LOD | <LOD   | 0.54 | 117  | 0.33 |
|              | LT6S        | <LOD | <LOD | <LOD  | <LOD  | <LOD     | <LOD     | <LOD  | <LOD   | <LOD    | <LOD    | <LOD     | <LOD    | <LOD      | <LOD     | <LOD | <LOD   | 1.3  | 170  | 0.55 |
|              | LT7S        | <LOD | <LOD | <LOD  | <LOD  | <LOD     | <LOD     | <LOD  | <LOD   | <LOD    | <LOD    | <LOD     | <LOD    | <LOD      | <LOD     | <LOD | <LOD   | 0.66 | 92   | 0.50 |
|              | MB_2        | <LOD | <LOD | <LOD  | <LOD  | <LOD     | <LOD     | <LOD  | <LOD   | <LOD    | <LOD    | <LOD     | <LOD    | <LOD      | <LOD     | <LOD | <LOD   | 0    | <LOD | N.A. |
|              | LT8S        | <LOD | <LOD | <LOD  | <LOD  | <LOD     | <LOD     | <LOD  | <LOD   | <LOD    | <LOD    | <LOD     | <LOD    | <LOD      | <LOD     | <LOD | <LOD   | 1.8  | <LOD | N.A. |
|              | LT9S        | <LOD | <LOD | <LOD  | <LOQ  | <LOD     | <LOD     | <LOD  | <LOD   | <LOD    | <LOD    | <LOD     | <LOD    | <LOD      | <LOD     | <LOD | <LOD   | 0.83 | 84   | 0.69 |
|              | LT10S       | <LOD | <LOD | <LOD  | <LOQ  | <LOD     | <LOD     | <LOD  | <LOD   | <LOD    | <LOD    | <LOD     | <LOD    | <LOD      | <LOD     | <LOD | <LOD   | 2.0  | 109  | 1.2  |
|              | LT11S_1     | <LOD | <LOD | <LOD  | <LOQ  | <LOD     | <LOD     | <LOD  | <LOD   | <LOD    | <LOD    | <LOD     | <LOD    | <LOD      | <LOD     | <LOD | <LOD   | 0.87 | 146  | 0.42 |
|              | LT11S_2     | <LOD | <LOD | <LOD  | <LOD  | <LOD     | <LOD     | <LOD  | <LOD   | <LOD    | <LOD    | <LOD     | <LOD    | <LOD      | <LOD     | <LOD | <LOD   | 2.1  | 102  | 1.5  |
|              | LT11S_3     | <LOD | <LOD | <LOD  | <LOD  | <LOD     | <LOD     | <LOD  | <LOD   | <LOD    | <LOD    | <LOD     | <LOD    | <LOD      | <LOD     | <LOD | <LOD   | 0.90 | 152  | 0.41 |
|              | LT12S       | <LOD | <LOD | <LOD  | <LOQ  | <LOD     | <LOD     | <LOD  | <LOD   | <LOD    | <LOD    | <LOD     | <LOD    | <LOD      | <LOD     | <LOD | <LOD   | 1.7  | 118  | 0.99 |
|              | MB_3        | <LOD | <LOD | <LOD  | <LOD  | <LOD     | <LOD     | <LOD  | <LOD   | <LOD    | <LOD    | <LOD     | <LOD    | <LOD      | <LOD     | <LOD | <LOD   | 0    | 283  | N.A. |
|              | LT13S       | <LOD | <LOD | <LOD  | <LOD  | <LOD     | <LOD     | <LOD  | <LOD   | <LOD    | <LOD    | <LOD     | <LOD    | <LOD      | <LOD     | <LOD | <LOD   | 2.5  | <LOD | N.A. |
| LT14S        | <LOD        | <LOD | <LOD | <LOD  | <LOD  | <LOD     | <LOD     | <LOD  | <LOD   | <LOD    | <LOD    | <LOD     | <LOD    | <LOD      | <LOD     | <LOD | 5.4    | <LOD | N.A. |      |
| LT15S        | <LOD        | <LOD | <LOD | <LOD  | <LOD  | <LOD     | <LOD     | <LOD  | <LOD   | <LOD    | <LOD    | <LOD     | <LOD    | <LOD      | <LOD     | <LOD | 0.95   | <LOD | N.A. |      |
| LT16S        | <LOD        | <LOD | <LOD | <LOD  | <LOD  | <LOD     | <LOD     | <LOD  | <LOD   | <LOD    | <LOD    | <LOD     | <LOD    | <LOD      | <LOD     | <LOD | 2.4    | <LOD | N.A. |      |
| LT17S        | <LOD        | <LOD | <LOD | <LOD  | <LOD  | <LOD     | <LOD     | <LOD  | <LOD   | <LOD    | <LOD    | <LOD     | <LOD    | <LOD      | <LOD     | <LOD | 1.3    | 313  | 0.30 |      |
| LT18S        | <LOD        | <LOD | <LOD | <LOQ  | <LOD  | <LOD     | <LOD     | <LOD  | <LOD   | <LOD    | <LOD    | <LOD     | <LOD    | <LOD      | <LOD     | <LOD | 0.90   | <LOD | N.A. |      |

Table S5. Concentration of target PFAS as well as the sum of target PFAS in soil and wax samples in ng/g (EOF in ng F/g) and snowmelt in ng/L (EOF ng F/L) and % of target PFAS in EOF

| Origin                             | Sample name                   | PFNS | PFDS | PFdDS | PFOSA | N-EtFOS A | 8Cl PFOS | PFOPA | GenX | Nadon a | 8:2 FTS | 10:2 FTS | PFOSA A | MetFO SE | EtFOSE | FOEA | Σ PFAS | EOF  | %    |
|------------------------------------|-------------------------------|------|------|-------|-------|-----------|----------|-------|------|---------|---------|----------|---------|----------|--------|------|--------|------|------|
| Lachtal soil                       | LT19S                         | <LOD | <LOD | <LOD  | <LOQ  | <LOD      | <LOD     | <LOD  | <LOD | <LOD    | <LOD    | <LOD     | <LOD    | <LOD     | <LOD   | <LOD | 0.65   | <LOD | 0    |
|                                    | LT20S_1                       | <LOD | <LOD | <LOD  | <LOQ  | <LOD      | <LOD     | <LOD  | <LOD | <LOD    | <LOD    | <LOD     | <LOD    | <LOD     | <LOD   | <LOD | 0.64   | <LOD | 0    |
|                                    | LT20S_2                       | <LOD | <LOD | <LOD  | <LOQ  | <LOD      | <LOD     | <LOD  | <LOD | <LOD    | <LOD    | <LOD     | <LOD    | <LOD     | <LOD   | <LOD | 0.62   | 67   | 0.65 |
| Klippitztorf soil                  | KPS soil from non-skiing area | <LOD | <LOD | <LOD  | <LOD  | <LOD      | <LOD     | <LOD  | <LOD | <LOD    | <LOD    | <LOD     | <LOD    | <LOD     | <LOD   | <LOD | 1.0    | N.A. | N.A. |
|                                    | KPS02                         | <LOD | <LOD | <LOD  | <LOD  | <LOD      | <LOD     | <LOD  | <LOD | <LOD    | <LOD    | <LOD     | <LOD    | <LOD     | <LOD   | <LOD | 4.0    | N.A. | N.A. |
|                                    | KPS03                         | <LOD | <LOD | <LOD  | <LOD  | <LOD      | <LOD     | <LOD  | <LOD | <LOD    | <LOD    | <LOD     | <LOD    | <LOD     | <LOD   | <LOD | 2.8    | N.A. | N.A. |
|                                    | KPS04-1                       | <LOD | <LOD | <LOD  | <LOD  | <LOD      | <LOD     | <LOD  | <LOD | <LOD    | <LOD    | <LOD     | <LOD    | <LOD     | <LOD   | <LOD | 0      | N.A. | N.A. |
|                                    | KPS04-2                       | <LOD | <LOD | <LOD  | <LOD  | <LOD      | <LOD     | <LOD  | <LOD | <LOD    | <LOD    | <LOD     | <LOD    | <LOD     | <LOD   | <LOD | 0      | N.A. | N.A. |
|                                    | KPS04-3                       | <LOD | <LOD | <LOD  | <LOD  | <LOD      | <LOD     | <LOD  | <LOD | <LOD    | <LOD    | <LOD     | <LOD    | <LOD     | <LOD   | <LOD | 0      | N.A. | N.A. |
| KPS06                              | <LOD                          | <LOD | <LOD | <LOD  | <LOD  | <LOD      | <LOD     | <LOD  | <LOD | <LOD    | <LOD    | <LOD     | <LOD    | <LOD     | <LOD   | 0    | N.A.   | N.A. |      |
| Teichalm and Klippitztorf snowmelt | KP MB                         | <LOD | <LOD | <LOD  | 1.4   | <LOQ      | <LOD     | <LOD  | <LOQ | <LOQ    | <LOD    | 1.3      | <LOQ    | <LOQ     | <LOQ   | <LOD | 18     | <LOQ | N.A. |
|                                    | TASB                          | <LOD | <LOD | <LOD  | <LOD  | <LOD      | <LOD     | <LOD  | <LOD | <LOD    | <LOD    | <LOD     | <LOD    | <LOD     | <LOD   | <LOD | 0      | <LOD | N.A. |
|                                    | KP01                          | <LOD | <LOD | <LOD  | <LOD  | <LOD      | <LOD     | <LOD  | <LOD | <LOD    | <LOD    | <LOD     | <LOD    | <LOD     | <LOD   | <LOD | 10     | <LOD | N.A. |
|                                    | KP02                          | <LOD | <LOD | <LOD  | <LOD  | <LOD      | <LOD     | <LOD  | <LOD | <LOD    | <LOD    | <LOD     | <LOD    | <LOD     | <LOD   | <LOD | 42     | <LOD | N.A. |
|                                    | KP03                          | <LOD | <LOD | <LOD  | <LOD  | <LOD      | <LOD     | <LOD  | <LOD | <LOD    | <LOD    | <LOD     | <LOD    | <LOD     | <LOD   | <LOD | 143    | <LOD | N.A. |
|                                    | KP04                          | <LOD | <LOD | <LOD  | <LOD  | <LOD      | <LOD     | <LOD  | <LOD | <LOD    | <LOD    | <LOD     | <LOD    | <LOD     | <LOD   | <LOD | 62     | <LOD | N.A. |
|                                    | KP05                          | <LOD | <LOD | <LOD  | <LOD  | <LOD      | <LOD     | <LOD  | <LOD | <LOD    | <LOD    | <LOD     | <LOD    | <LOD     | <LOD   | <LOD | 49     | <LOD | N.A. |
|                                    | KP06                          | <LOD | <LOD | <LOD  | <LOD  | <LOD      | <LOD     | <LOD  | <LOD | <LOD    | <LOD    | <LOD     | <LOD    | <LOD     | <LOD   | <LOD | 69     | <LOD | N.A. |
|                                    | TA03                          | <LOD | <LOD | <LOD  | <LOD  | <LOD      | <LOD     | <LOD  | <LOD | <LOD    | <LOD    | <LOD     | <LOD    | <LOD     | <LOD   | <LOD | 109    | <LOD | N.A. |
| TA04                               | <LOD                          | <LOD | <LOD | <LOD  | <LOD  | <LOD      | <LOD     | <LOD  | <LOD | <LOD    | <LOD    | <LOD     | <LOD    | <LOD     | <LOD   | 81   | <LOD   | N.A. |      |

Table S5. Concentration of target PFAS as well as the sum of target PFAS in soil and wax samples in ng/g (EOF in ng F/g) and snowmelt in ng/L (EOF ng F/L) and % of target PFAS in EOF.

| Origin              | Sample name    | PFNS | PFDS | PFdDS | PFOSA | N-EtFOSA | 8Cl PFOS | PFOPA | GenX | Nadon a | 8:2 FTS | 10:2 FTS | PFOSA A | MetFO SE | EtFOSE | FOEA | Σ PFAS | EOF  | %    |
|---------------------|----------------|------|------|-------|-------|----------|----------|-------|------|---------|---------|----------|---------|----------|--------|------|--------|------|------|
| Lachtal snowmelt    | <b>LTSN MB</b> | <LOD | <LOD | <LOD  | 1.4   | <LOD     | <LOD     | <LOD  | <LOD | <LOD    | <LOD    | 1.2      | <LOD    | <LOD     | <LOD   | <LOD | 18     | 0.87 | 1.4  |
|                     | <b>LTSN00</b>  | <LOD | <LOD | <LOD  | <LOQ  | <LOD     | <LOD     | <LOD  | <LOD | <LOD    | <LOD    | <LOD     | <LOD    | <LOD     | <LOD   | <LOD | 0.0    | <LOD | N.A. |
|                     | <b>LTSN01</b>  | <LOD | <LOD | <LOD  | <LOQ  | <LOD     | <LOD     | <LOD  | <LOD | <LOD    | <LOD    | <LOD     | <LOQ    | <LOD     | <LOD   | <LOD | 0.0    | <LOD | N.A. |
|                     | <b>LTSN02</b>  | <LOD | <LOD | <LOD  | <LOD  | <LOD     | <LOD     | <LOD  | <LOD | <LOD    | <LOD    | <LOD     | <LOQ    | <LOD     | <LOD   | <LOD | 0.0    | <LOD | N.A. |
|                     | <b>LTSN03</b>  | <LOD | <LOD | <LOD  | <LOQ  | <LOD     | <LOD     | <LOD  | <LOD | <LOD    | <LOD    | <LOD     | <LOQ    | <LOD     | <LOD   | <LOD | 0.0    | <LOD | N.A. |
|                     | <b>LTSN04</b>  | <LOD | <LOD | <LOD  | <LOQ  | <LOD     | <LOD     | <LOD  | <LOD | <LOD    | <LOD    | <LOD     | <LOQ    | <LOD     | <LOD   | <LOD | 0.0    | <LOD | N.A. |
|                     | <b>LTSN05</b>  | <LOD | <LOD | <LOD  | <LOQ  | <LOD     | <LOD     | <LOD  | <LOD | <LOD    | <LOD    | <LOD     | <LOQ    | <LOD     | <LOD   | <LOD | 0.0    | <LOQ | N.A. |
|                     | <b>LTSN06</b>  | <LOD | <LOD | <LOD  | <LOQ  | <LOD     | <LOD     | <LOD  | <LOD | <LOD    | <LOD    | <LOD     | <LOQ    | <LOD     | <LOD   | <LOD | 0.0    | <LOD | N.A. |
| <b>LTSN07</b>       | <LOD           | <LOD | <LOD | <LOD  | <LOD  | <LOD     | <LOD     | <LOD  | <LOD | <LOD    | <LOD    | <LOD     | <LOD    | <LOD     | <LOD   | 0.0  | <LOD   | N.A. |      |
| Schladming snowmelt | <b>SDMB</b>    | <LOD | <LOD | <LOD  | <LOD  | <LOD     | <LOD     | <LOD  | <LOD | <LOD    | <LOD    | <LOD     | <LOD    | <LOD     | <LOD   | <LOD | 0.0    | <LOD | N.A. |
|                     | <b>SD01</b>    | <LOD | <LOD | <LOD  | <LOD  | <LOD     | <LOD     | <LOD  | <LOD | <LOD    | <LOD    | <LOD     | <LOD    | <LOD     | <LOD   | <LOD | 47     | <LOD | N.A. |
|                     | <b>SD02</b>    | <LOD | <LOD | <LOD  | <LOD  | <LOD     | <LOD     | <LOD  | <LOD | <LOD    | <LOD    | <LOD     | <LOD    | <LOD     | <LOD   | <LOD | 0.0    | <LOD | N.A. |
|                     | <b>SD03</b>    | <LOD | <LOD | <LOD  | <LOD  | <LOD     | <LOD     | <LOD  | <LOD | <LOD    | <LOD    | <LOD     | <LOD    | <LOD     | <LOD   | <LOD | 1.7    | <LOD | N.A. |
|                     | <b>SD04</b>    | <LOD | <LOD | <LOD  | <LOD  | <LOD     | <LOD     | <LOD  | <LOD | <LOD    | <LOD    | <LOD     | <LOD    | <LOD     | <LOD   | <LOD | 0.0    | <LOD | N.A. |
|                     | <b>SD05</b>    | <LOD | <LOD | <LOD  | <LOD  | <LOD     | <LOD     | <LOD  | <LOD | <LOD    | <LOD    | <LOD     | <LOD    | <LOD     | <LOD   | <LOD | 25     | <LOD | N.A. |
|                     | <b>HS00</b>    | <LOD | <LOD | <LOD  | <LOD  | <LOD     | <LOD     | <LOD  | <LOD | <LOD    | <LOD    | <LOD     | <LOD    | <LOD     | <LOD   | <LOD | 0.0    | <LOD | N.A. |

Table S5. Concentration of target PFAS as well as the sum of target PFAS in soil and wax samples in ng/g (EOF in ng F/g) and snowmelt in ng/L (EOF ng F/L) and % of target PFAS in EOF.

| Origin  | Sample name | PFNS | PFDS | PFdDS | PFOSA | N-EtFOSA | 8Cl PFOS | PFOPA | GenX | Nadon a | 8:2 FTS | 10:2 FTS | PFOSA A | MetFO SE | EtFOSE | FOEA | Σ PFAS | EOF  | %       |         |      |
|---------|-------------|------|------|-------|-------|----------|----------|-------|------|---------|---------|----------|---------|----------|--------|------|--------|------|---------|---------|------|
| Ski wax | MB_Wax1     | <LOD | <LOD | <LOD  | <LOD  | <LOD     | <LOD     | <LOD  | <LOD | <LOD    | <LOD    | <LOD     | <LOD    | <LOD     | <LOD   | <LOD | <LOD   | <LOD | <LOD    | N.A.    |      |
|         | MB_Wax2     | <LOD | <LOD | <LOD  | <LOD  | <LOD     | <LOD     | <LOD  | <LOD | <LOD    | <LOD    | <LOD     | <LOD    | <LOD     | <LOD   | <LOD | <LOD   | <LOD | <LOD    | <LOD    | N.A. |
|         | MB_Wax3     | <LOD | <LOD | <LOD  | <LOD  | <LOD     | <LOD     | <LOD  | <LOD | <LOD    | <LOD    | <LOD     | <LOD    | <LOD     | <LOD   | <LOD | <LOD   | <LOD | <LOD    | <LOD    | N.A. |
|         | Wax_1_1     | <LOD | <LOD | <LOD  | <LOD  | <LOD     | <LOD     | <LOD  | <LOD | <LOD    | <LOD    | <LOD     | <LOD    | <LOD     | <LOD   | <LOD | <LOD   | <LOD | <LOD    | <LOD    | N.A. |
|         | Wax_1_2     | <LOD | <LOD | <LOD  | <LOD  | <LOD     | <LOD     | <LOD  | <LOD | <LOD    | <LOD    | <LOD     | <LOD    | <LOD     | <LOD   | <LOD | <LOD   | <LOD | <LOD    | <LOD    | N.A. |
|         | Wax_1_3     | <LOD | <LOD | <LOD  | <LOD  | <LOD     | <LOD     | <LOD  | <LOD | <LOD    | <LOD    | <LOD     | <LOD    | <LOD     | <LOD   | <LOD | <LOD   | <LOD | <LOD    | <LOD    | N.A. |
|         | Wax_2_1     | <LOD | <LOD | <LOD  | <LOD  | <LOD     | <LOD     | <LOD  | <LOD | <LOD    | <LOD    | <LOD     | <LOD    | <LOD     | <LOD   | <LOD | <LOD   | <LOD | <LOD    | <LOD    | N.A. |
|         | Wax_2_2     | <LOD | <LOD | <LOD  | <LOD  | <LOD     | <LOD     | <LOD  | <LOD | <LOD    | <LOD    | <LOD     | <LOD    | <LOD     | <LOD   | <LOD | <LOD   | <LOD | <LOD    | <LOD    | N.A. |
|         | Wax_2_3     | <LOD | <LOD | <LOD  | <LOD  | <LOD     | <LOD     | <LOD  | <LOD | <LOD    | <LOD    | <LOD     | <LOD    | <LOD     | <LOD   | <LOD | <LOD   | <LOD | <LOD    | <LOD    | N.A. |
|         | Wax_3_1     | <LOD | <LOD | <LOD  | <LOD  | <LOD     | <LOD     | <LOD  | <LOD | <LOD    | <LOD    | <LOD     | <LOD    | <LOD     | <LOD   | <LOD | <LOD   | 307  | <LOD    | 518000  | 0.04 |
|         | Wax_3_2     | <LOD | <LOD | <LOD  | <LOD  | <LOD     | <LOD     | <LOD  | <LOD | <LOD    | <LOD    | <LOD     | <LOD    | <LOD     | <LOD   | <LOD | <LOD   | 324  | <LOD    | 558000  | 0.04 |
|         | Wax_3_3     | <LOD | <LOD | <LOD  | <LOD  | <LOD     | <LOD     | <LOD  | <LOD | <LOD    | <LOD    | <LOD     | <LOD    | <LOD     | <LOD   | <LOD | <LOD   | 390  | <LOD    | 540000  | 0.05 |
|         | Wax_4_1     | <LOD | <LOD | <LOD  | <LOD  | <LOD     | <LOD     | <LOD  | <LOD | <LOD    | <LOD    | <LOD     | <LOD    | <LOD     | <LOD   | <LOD | <LOD   | <LOD | <LOD    | 921000  | 0.06 |
|         | Wax_4_2     | <LOD | <LOD | <LOD  | <LOD  | <LOD     | <LOD     | <LOD  | <LOD | <LOD    | <LOD    | <LOD     | <LOD    | <LOD     | <LOD   | <LOD | <LOD   | <LOD | <LOD    | 519000  | 0.10 |
|         | Wax_4_3     | <LOD | <LOD | <LOD  | <LOD  | <LOD     | <LOD     | <LOD  | <LOD | <LOD    | <LOD    | <LOD     | <LOD    | <LOD     | <LOD   | <LOD | <LOD   | <LOD | <LOD    | 567000  | 0.04 |
|         | Wax_5_1     | <LOD | <LOD | <LOD  | <LOD  | <LOD     | <LOD     | <LOD  | <LOD | <LOD    | <LOD    | <LOD     | <LOD    | <LOD     | <LOD   | <LOD | <LOD   | <LOD | <LOD    | 662000  | N.A. |
|         | Wax_5_2     | <LOD | <LOD | <LOD  | <LOD  | <LOD     | <LOD     | <LOD  | <LOD | <LOD    | <LOD    | <LOD     | <LOD    | <LOD     | <LOD   | <LOD | <LOD   | <LOD | <LOD    | 689000  | N.A. |
|         | Wax_5_3     | <LOD | <LOD | <LOD  | <LOD  | <LOD     | <LOD     | <LOD  | <LOD | <LOD    | <LOD    | <LOD     | <LOD    | <LOD     | <LOD   | <LOD | <LOD   | <LOD | <LOD    | 296000  | N.A. |
|         | Wax_6_1     | <LOD | <LOD | <LOD  | <LOD  | <LOD     | <LOD     | <LOD  | <LOD | <LOD    | <LOD    | <LOD     | <LOD    | <LOD     | <LOD   | <LOD | <LOD   | <LOD | <LOD    | 2320000 | 0.01 |
| Wax_6_2 | <LOD        | <LOD | <LOD | <LOD  | <LOD  | <LOD     | <LOD     | <LOD  | <LOD | <LOD    | <LOD    | <LOD     | <LOD    | <LOD     | <LOD   | <LOD | <LOD   | <LOD | 1850000 | 0.01    |      |
| Wax_6_3 | <LOD        | <LOD | <LOD | <LOD  | <LOD  | <LOD     | <LOD     | <LOD  | <LOD | <LOD    | <LOD    | <LOD     | <LOD    | <LOD     | <LOD   | <LOD | <LOD   | <LOD | 2180000 | 0.01    |      |

MB: method blank. N.A.: not applicable. <LOQ: below limit of quantification. <LOD: below limit of detection.

Table S6a. Average recoveries ± standard deviation (n=3) of PFAS from different sample media (%) using target analysis.

| Sample matrix | PFBA    | PFPA    | PFHxA    | PFHpA   | PFOA     | PFNA    | PFDA     | PFuDA   | PFdDA   | PFtrDA  | PFteDA | PFhxDA  | PFoDA   | PFBS    | PFPS    | PFHxS    | PFHpS   |
|---------------|---------|---------|----------|---------|----------|---------|----------|---------|---------|---------|--------|---------|---------|---------|---------|----------|---------|
| Wax           | 42 ± 9  | 50 ± 7  | 72 ± 10  | 69 ± 6  | 61 ± 6   | 65 ± 4  | 72 ± 4   | 73 ± 5  | 73 ± 4  | 70 ± 3  | 72 ± 4 | 86 ± 3  | 90 ± 4  | 57 ± 7  | 54 ± 5  | 47 ± 26  | 70 ± 4  |
| Snowmelt      | 99 ± 8  | 98 ± 10 | 111 ± 11 | 113 ± 9 | 106 ± 11 | 101 ± 8 | 105 ± 10 | 97 ± 7  | 88 ± 4  | 98 ± 3  | 70 ± 0 | 17 ± 1  | 2 ± 0   | 80 ± 6  | 102 ± 9 | 103 ± 26 | 98 ± 12 |
| Soil          | 57 ± 11 | 57 ± 10 | 59 ± 14  | 61 ± 12 | 56 ± 8   | 58 ± 10 | 57 ± 11  | 56 ± 15 | 51 ± 11 | 33 ± 17 | 38 ± 9 | 30 ± 12 | 31 ± 14 | 62 ± 11 | 59 ± 11 | 62 ± 16  | 59 ± 12 |

| Sample matrix | PFOS     | PFNS    | PFDS    | PFdDS   | PFOSA   | FOEA     | 8Cl PFOS | PFOPA  | GenX   | Nadona | 8:2 FTS | 10:2 FTS | PFOSAA  | N-MetFOSE | N-EtFOSE | N-EtFOSA |
|---------------|----------|---------|---------|---------|---------|----------|----------|--------|--------|--------|---------|----------|---------|-----------|----------|----------|
| Wax           | 82 ± 6   | 72 ± 5  | 80 ± 3  | 76 ± 3  | 23 ± 6  | 10 ± 4   | 60 ± 3   | 20 ± 5 | 42 ± 5 | 56 ± 4 | 48 ± 3  | 53 ± 2   | 59 ± 3  | 43 ± 3    | 15 ± 5   | 26 ± 6   |
| Snowmelt      | 110 ± 12 | 97 ± 11 | 99 ± 11 | 76 ± 9  | 67 ± 11 | 100 ± 15 | 68 ± 9   | 62 ± 8 | 76 ± 9 | 76 ± 9 | 69 ± 11 | 67 ± 7   | 59 ± 5  | N.R.      | N.R.     | N.R.     |
| Soil          | 59 ± 12  | 62 ± 13 | 63 ± 16 | 65 ± 13 | 1 ± 0   | 46 ± 28  | 60 ± 2   | N.R.   | 63 ± 5 | 62 ± 7 | 75 ± 10 | 88 ± 17  | 65 ± 28 | N.R.      | N.R.     | N.R.     |

N.R.: not recovered



Table S6b. Average recoveries ± standard deviation (n=3) of isotopically labelled PFAS from different sample media (%) using target analysis.

| Sample matrix | M3PFBA | M2PFOA | MPFDA  | M3PFOS |  |  |
|---------------|--------|--------|--------|--------|--|--|
| Soil          | 98 ± 5 | 87 ± 6 | 81 ± 6 | 92 ± 5 |  |  |
| Water         | 93 ± 1 | 96 ± 5 | 91 ± 6 | 89 ± 5 |  |  |
| Wax           | 49 ± 2 | 54 ± 2 | 54 ± 4 | 51 ± 3 |  |  |

Table S7. Average recoveries ± standard deviation (n=3) of EOF analysis with CIC and with HR-GF-MAS\*

| Sample matrix                                | Recovery (%) |
|----------------------------------------------|--------------|
| Wax methanol (spiked before extraction)      | 63 ± 26      |
| Wax hexane (spiked before extraction)        | 9 ± 2        |
| Soil (spiked before extraction)              | 191 ± 70     |
| Snowmelt (spiked before extraction)          | NA           |
| Wax methanol (spiked before extraction)*     | 63 ± 21      |
| Methanol spiked with inorganic and organic F | 105 ± 19     |
| BCR-461 (clay reference material)            | 95 ± 3       |

Table S8. Average recoveries ± standard deviation (n=3) of TF analysis (%).

| Sample matrix | Recovery (%) |
|---------------|--------------|
| Wax           | 109 ± 7      |

Table S9. Concentration of EOF in wax samples extracted with hexane in  $\mu\text{g F/g}$ .

| Name           | EOF ( $\mu\text{g F/g}$ ) | Average EOF $\mu\text{gF/g}$ | Standard deviation | RSD (%) |
|----------------|---------------------------|------------------------------|--------------------|---------|
| Wax_1_Hexane_1 | <LOQ                      | <LOQ                         | N.A.               | N.A.    |
| Wax_1_Hexane_2 | <LOQ                      |                              |                    |         |
| Wax_1_Hexane_3 | <LOQ                      |                              |                    |         |
| Wax_2_Hexane_1 | <LOQ                      | <LOQ                         | N.A.               | N.A.    |
| Wax_2_Hexane_2 | <LOQ                      |                              |                    |         |
| Wax_2_Hexane_3 | <LOQ                      |                              |                    |         |
| Wax_3_Hexane_1 | 1018                      | 1973                         | 685                | 35      |
| Wax_3_Hexane_2 | 2590                      |                              |                    |         |
| Wax_3_Hexane_3 | 2312                      |                              |                    |         |
| Wax_4_Hexane_1 | 2461                      | 2615                         | 109                | 4       |
| Wax_4_Hexane_2 | 2687                      |                              |                    |         |
| Wax_4_Hexane_3 | 2698                      |                              |                    |         |
| Wax_5_Hexane_1 | 3469                      | 3775                         | 588                | 16      |
| Wax_5_Hexane_2 | 3259                      |                              |                    |         |
| Wax_5_Hexane_3 | 4597                      |                              |                    |         |
| Wax_6_Hexane_1 | 19178                     | 18928                        | 2035               | 11      |
| Wax_6_Hexane_2 | 16319                     |                              |                    |         |
| Wax_6_Hexane_3 | 21285                     |                              |                    |         |

N.A.: not applicable

Table S10. EOF concentrations in wax samples, extracted with MetOH, measured with HR-GF-MAS

| Name      | EOF ( $\mu\text{gF/g}$ ) | average conc ( $\mu\text{gF/g}$ ) | sdev conc ( $\mu\text{gF/g}$ ) | rsd (%) | measured with CIC ( $\mu\text{gF/g}$ ) | how much more? | p of t test |
|-----------|--------------------------|-----------------------------------|--------------------------------|---------|----------------------------------------|----------------|-------------|
| waxE_MB_1 | <LOQ                     | <LOQ                              | N.A.                           | N.A.    | <LOQ                                   | N.A.           | N.A.        |
| waxE_MB_2 | <LOQ                     |                                   |                                |         |                                        |                |             |
| waxE_MB_3 | <LOQ                     |                                   |                                |         |                                        |                |             |
| waxE_2_1  | <LOQ                     | <LOQ                              | N.A.                           | N.A.    | <LOQ                                   | N.A.           | N.A.        |
| waxE_2_2  | <LOQ                     |                                   |                                |         |                                        |                |             |
| waxE_2_3  | <LOQ                     |                                   |                                |         |                                        |                |             |
| waxE_1_1  | <LOQ                     | <LOQ                              | N.A.                           | N.A.    | <LOQ                                   | N.A.           | N.A.        |
| waxE_1_2  | <LOQ                     |                                   |                                |         |                                        |                |             |
| waxE_1_3  | <LOQ                     |                                   |                                |         |                                        |                |             |
| waxE_3_1  | 959                      | 1327                              | 322                            | 24      | 518                                    | 2              | 0.03        |
| waxE_3_2  | 1278                     |                                   |                                |         | 558                                    | 2              |             |
| waxE_3_3  | 1742                     |                                   |                                |         | 540                                    | 3              |             |
| waxE_4_1  | 2118                     | 2098                              | 157                            | 7       | 921                                    | 2              | 0.001       |
| waxE_4_2  | 2278                     |                                   |                                |         | 519                                    | 4              |             |
| waxE_4_3  | 1896                     |                                   |                                |         | 567                                    | 3              |             |
| waxE_5_1  | 2717                     | 2788                              | 365                            | 13      | 662                                    | 4              | 0.001       |
| waxE_5_2  | 2380                     |                                   |                                |         | 689                                    | 3              |             |
| waxE_5_3  | 3267                     |                                   |                                |         | 296                                    | 11             |             |
| waxE_6_1  | 15992                    | 13405                             | 1830                           | 14      | 2319                                   | 7              | 0.001       |
| waxE_6_2  | 12187                    |                                   |                                |         | 1851                                   | 7              |             |
| waxE_6_3  | 12036                    |                                   |                                |         | 2175                                   | 6              |             |

Table 11 Enrichment factor.

| Sample name    | Mass (g) | End volume (mL) | enrichment factor | average enrichment factor |
|----------------|----------|-----------------|-------------------|---------------------------|
| LT1S           | 2.0747   | 1               | 2.07              | 2.043                     |
| LT2S           | 2.0991   | 1               | 2.10              |                           |
| LT3S           | 2.0169   | 1               | 2.02              |                           |
| LT4S           | 2.0794   | 1               | 2.08              |                           |
| LT5S           | 2.0301   | 1               | 2.03              |                           |
| LT6S           | 2.0133   | 1               | 2.01              |                           |
| LT7S           | 2.0052   | 1               | 2.01              |                           |
| LT8S           | 2.0700   | 1               | 2.07              |                           |
| LT9S           | 2.0236   | 1               | 2.02              |                           |
| LT10S          | 2.0473   | 1               | 2.05              |                           |
| LT11S_1        | 2.0536   | 1               | 2.05              |                           |
| LT11S_2        | 2.052    | 1               | 2.05              |                           |
| LT11S_3        | 2.0528   | 1               | 2.05              |                           |
| LT12S          | 2.0277   | 1               | 2.03              |                           |
| LT13S          | 2.200    | 1               | 2.20              |                           |
| LT14S          | 1.990    | 1               | 1.99              |                           |
| LT15S          | 2.160    | 1               | 2.16              |                           |
| LT16S          | 2.080    | 1               | 2.08              |                           |
| LT17S          | 2.050    | 1               | 2.05              |                           |
| LT18S          | 2.0115   | 1               | 2.01              |                           |
| LT19S          | 2.0226   | 1               | 2.02              |                           |
| LT20S_1        | 2.0612   | 1               | 2.06              |                           |
| LT20S_2        | 2.0529   | 1               | 2.05              |                           |
| KPS blank soil | 1.9999   | 1               | 2.00              |                           |
| KPS 02         | 1.9949   | 1               | 1.99              |                           |
| KPS 03         | 2.0025   | 1               | 2.00              |                           |
| KPS 04-1       | 2.0213   | 1               | 2.02              |                           |
| KPS 04-2       | 2.0167   | 1               | 2.02              |                           |
| KPS 04-3       | 1.9965   | 1               | 2.00              |                           |
| KPS 06         | 1.994    | 1               | 1.99              |                           |
| TASB           | 212      | 1               | 212               |                           |
| KP01           | 206      | 1               | 206               |                           |
| KP02           | 208      | 1               | 208               |                           |
| KP03           | 157      | 1               | 157               |                           |
| KP04           | 209      | 1               | 209               |                           |
| KP05           | 208      | 1               | 208               |                           |
| KP06           | 209      | 1               | 209               |                           |
| TA03           | 201      | 1               | 201               |                           |
| TA04           | 214      | 1               | 214               |                           |
| LTSN00         | 205      | 1               | 205               |                           |
| LTSN01         | 139      | 1               | 139               |                           |
| LTSN02         | 204      | 1               | 204               |                           |

Table S11. Enrichment factor continued

| Sample name | Mass (g) | End volume (mL) | enrichment factor | average enrichment factor |
|-------------|----------|-----------------|-------------------|---------------------------|
| LTSN03      | 80       | 1               | 80                | 245                       |
| LTSN04      | 199      | 1               | 199               |                           |
| LTSN05      | 205      | 1               | 205               |                           |
| LTSN06      | 209      | 1               | 209               |                           |
| LTSN07      | 211      | 1               | 211               |                           |
| SD01        | 500      | 1               | 500               |                           |
| SD02        | 500      | 1               | 500               |                           |
| SD03        | 500      | 1               | 500               |                           |
| SD04        | 500      | 1               | 500               |                           |
| SD05        | 150      | 1               | 150               |                           |
| HS00        | 200      | 1               | 200               |                           |
| Wax_1_1     | 0.2075   | 1               | 0.21              |                           |
| Wax_1_2     | 0.2009   | 1               | 0.20              |                           |
| Wax_1_3     | 0.2067   | 1               | 0.21              |                           |
| Wax_2_1     | 0.2047   | 1               | 0.20              |                           |
| Wax_2_2     | 0.2061   | 1               | 0.21              |                           |
| Wax_2_3     | 0.2116   | 1               | 0.21              |                           |
| Wax_3_1     | 0.2042   | 1               | 0.20              |                           |
| Wax_3_2     | 0.1997   | 1               | 0.20              |                           |
| Wax_3_3     | 0.2053   | 1               | 0.21              |                           |
| Wax_4_1     | 0.207    | 1               | 0.21              |                           |
| Wax_4_2     | 0.2099   | 1               | 0.21              |                           |
| Wax_4_3     | 0.2086   | 1               | 0.21              |                           |
| Wax_5_1     | 0.204    | 1               | 0.20              |                           |
| Wax_5_2     | 0.1987   | 1               | 0.20              |                           |
| Wax_5_3     | 0.2056   | 1               | 0.21              |                           |
| Wax_6_1     | 0.2079   | 1               | 0.21              |                           |
| Wax_6_2     | 0.2010   | 1               | 0.20              |                           |
| Wax_6_3     | 0.2006   | 1               | 0.20              |                           |

Table S12. Instrumental and averaged method limit of quantifications for target PFAS analysis.

|                                          | PFBA         | PFPA         | PFHxA        | PFHpA        | PFOA         | PFNA         | PFDA         | PFuDA        | PFdDA        | PFtrDA       | PFteDA       | PFhxDA       | PFoDA       | PFBS         | PFPS         | PFHxS        | PFHpS        | PFOS         |
|------------------------------------------|--------------|--------------|--------------|--------------|--------------|--------------|--------------|--------------|--------------|--------------|--------------|--------------|-------------|--------------|--------------|--------------|--------------|--------------|
| Instrumental LOQ for Lachtal soil (µg/L) | <b>0.114</b> | <b>0.134</b> | <b>0.102</b> | <b>0.153</b> | <b>0.332</b> | <b>0.115</b> | <b>0.056</b> | <b>0.044</b> | <b>0.090</b> | <b>0.237</b> | <b>0.133</b> | <b>8.0</b>   | <b>8.6</b>  | <b>0.085</b> | <b>0.187</b> | <b>0.175</b> | <b>0.086</b> | <b>0.391</b> |
| Method LOQ for Lachtal soil (ng/g)       | 0.062        | 0.073        | 0.056        | 0.083        | 0.181        | 0.062        | 0.030        | 0.024        | 0.049        | 0.129        | 0.073        | 4.367        | 4.670       | 0.046        | 0.102        | 0.095        | 0.047        | 0.212        |
| Instrumental LOQ for snowmelt (µg/L)     | <b>0.714</b> | <b>0.351</b> | <b>0.499</b> | <b>1.1</b>   | <b>60.8</b>  | <b>0.372</b> | <b>4.156</b> | <b>0.170</b> | <b>0.122</b> | <b>0.087</b> | <b>0.144</b> | <b>0.883</b> | <b>2.0</b>  | <b>0.609</b> | <b>0.405</b> | <b>0.308</b> | <b>0.197</b> | <b>0.354</b> |
| Method LOQ for snowmelts (ng/g)          | 0.0032       | 0.0016       | 0.0023       | 0.0050       | 0.2764       | 0.0017       | 0.0189       | 0.0008       | 0.0006       | 0.0004       | 0.0007       | 0.0040       | 0.0090      | 0.0028       | 0.0018       | 0.0014       | 0.0009       | 0.0016       |
| Instrumental LOQ for wax (µg/L)          | <b>1.0</b>   | <b>1.4</b>   | <b>11.7</b>  | <b>12.7</b>  | <b>6.9</b>   | <b>1.00</b>  | <b>0.15</b>  | <b>0.48</b>  | <b>0.39</b>  | <b>0.32</b>  | <b>0.11</b>  | <b>0.23</b>  | <b>0.21</b> | <b>2.67</b>  | <b>0.38</b>  | <b>0.64</b>  | <b>0.45</b>  | <b>0.35</b>  |
| Method LOQ for wax (ng/g)                | 5.60         | 7.60         | 63.47        | 68.67        | 37.51        | 5.40         | 0.84         | 2.61         | 2.11         | 1.72         | 0.60         | 1.27         | 1.12        | 14.49        | 2.07         | 3.49         | 2.43         | 1.89         |

|                                          | PFNS         | PFDS         | PFdDS        | PFOSA        | N-EtFOSA     | 8Cl PFOS     | PFOPA        | GenX         | Nadona       | 8:2 FTS      | 10:2 FTS     | PFOSAA       | N-MetFOSE    | N-EtFOSE     | FOEA       |
|------------------------------------------|--------------|--------------|--------------|--------------|--------------|--------------|--------------|--------------|--------------|--------------|--------------|--------------|--------------|--------------|------------|
| Instrumental LOQ for Lachtal soil (µg/L) | <b>0.147</b> | <b>0.163</b> | <b>1.1</b>   | <b>0.034</b> | <b>0.066</b> | <b>0.127</b> | <b>2.642</b> | <b>0.057</b> | <b>0.137</b> | <b>0.306</b> | <b>0.162</b> | <b>0.291</b> | <b>0.054</b> |              |            |
| Method LOQ for Lachtal soil (ng/g)       | 0.080        | 0.089        | 0.592        | 0.019        | 0.036        | 0.069        | 1.437        | 0.031        | 0.074        | 0.166        | 0.088        | 0.158        | 0.030        | 0.000        | 0.000      |
| Instrumental LOQ for snowmelt (µg/L)     | <b>0.299</b> | <b>0.247</b> | <b>0.340</b> | <b>0.527</b> | <b>0.443</b> | <b>1.45</b>  | <b>N.M.</b>  | <b>0.905</b> | <b>0.296</b> | <b>5.3</b>   | <b>1.7</b>   | <b>0.779</b> | <b>0.289</b> | <b>0.820</b> | <b>5.1</b> |
| Method LOQ for snowmelts (ng/g)          | 0.0014       | 0.0011       | 0.0015       | 0.0024       | 0.0020       | 0.0066       | N.M.         | 0.0041       | 0.0013       | 0.0239       | 0.0079       | 0.0035       | 0.0013       | 0.0037       | 0.0233     |
| Instrumental LOQ for wax (µg/L)          | <b>0.22</b>  | <b>0.34</b>  | <b>1.2</b>   | <b>1.4</b>   | <b>1.7</b>   | <b>0.27</b>  | <b>3.9</b>   | <b>2.1</b>   | <b>1.5</b>   | <b>0.58</b>  | <b>1.4</b>   | <b>1.1</b>   |              | <b>1.5</b>   | <b>2.9</b> |
| Method LOQ for wax (ng/g)                | 1.20         | 1.84         | 6.65         | 7.57         | 9.40         | 1.47         | 21.06        | 11.20        | 8.17         | 3.14         | 7.35         | 6.15         |              | 8.17         | 15.83      |

Table S13. Averaged method limit of quantifications for EOF analysis (with CIC and HR-GF-MAS).

|                                    | <b>CIC</b> | <b>HR-GF-MAS</b> |
|------------------------------------|------------|------------------|
| Method LOQ for Lachtal soil (ng/g) | 35         | N.A              |
| Method LOQ for snowmelts (ng/g)    | 0.81       | N.A              |
| Method LOQ for wax (ng/g)          | 1039       | 1414             |

N.A: not applicable

Table S14. Total fluorine concentration in wax samples.

| Sample code | Fluorine concentration (µg/g) | average EOF methanol (µg/g) | average EOF hexane (µg/g) | % of methanol | % of hexane |
|-------------|-------------------------------|-----------------------------|---------------------------|---------------|-------------|
| 1           | < 16                          |                             |                           |               |             |
| 2           | < 16                          |                             |                           |               |             |
| 3           | 4280 ± 140                    | 539                         | 1970                      | 13            | 46          |
| 4           | 4450 ± 360                    | 669                         | 2620                      | 15            | 59          |
| 5           | 4770 ± 400                    | 549                         | 3780                      | 12            | 79          |
| 6           | 31200 ± 420                   | 2120                        | 18900                     | 7             | 61          |

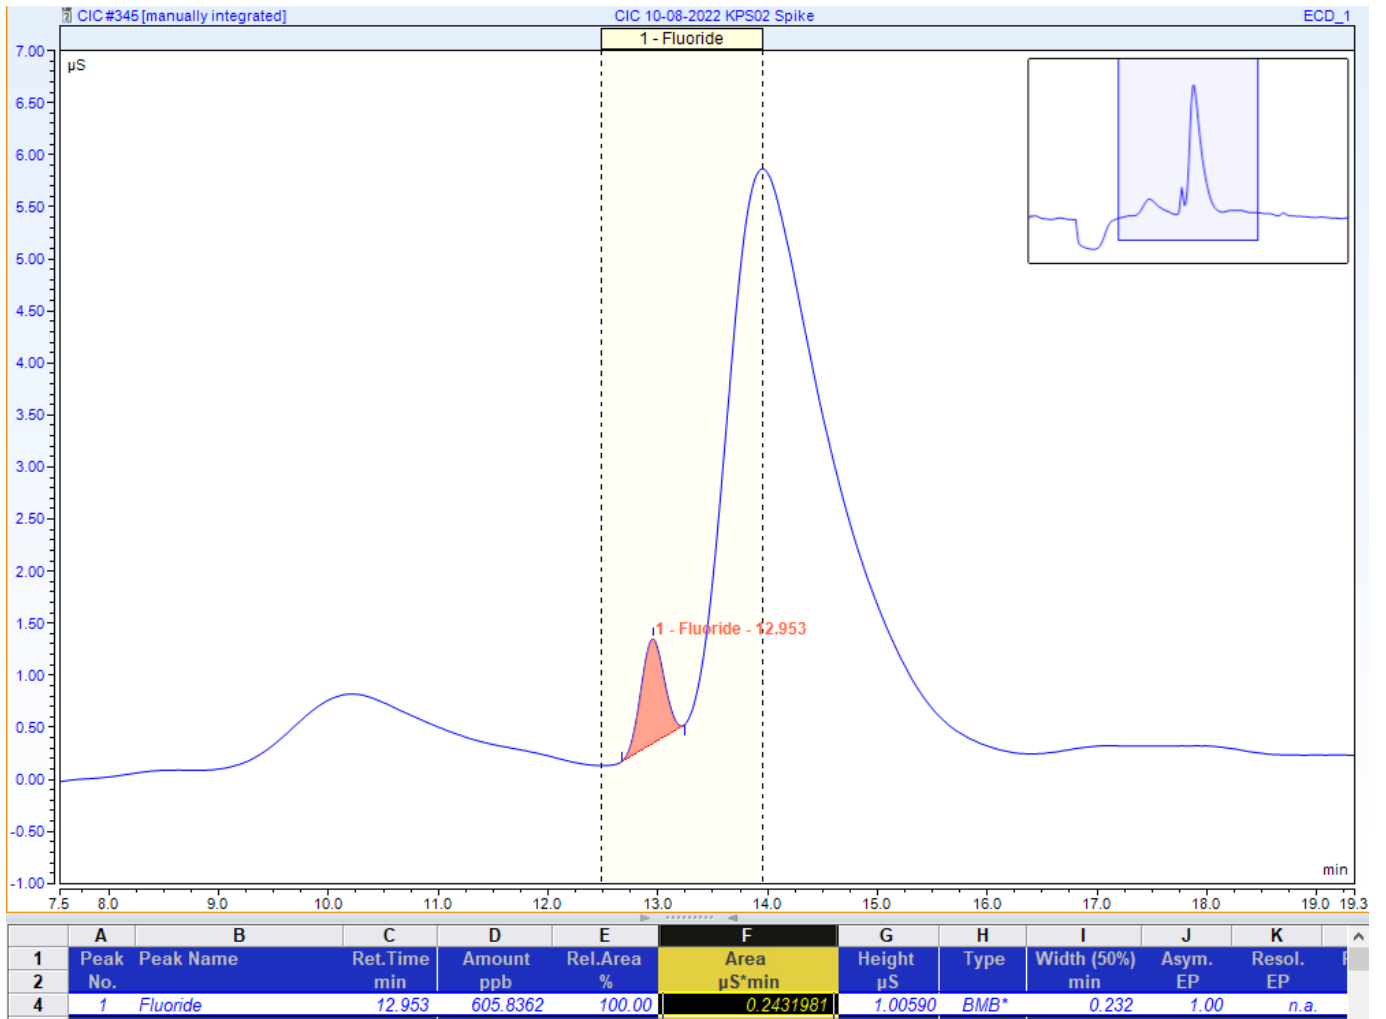

Figure S1. Klippitztörl soil ion chromatogram with CIC in KPS02 sample spiked with 1 ppm PFAS mix.



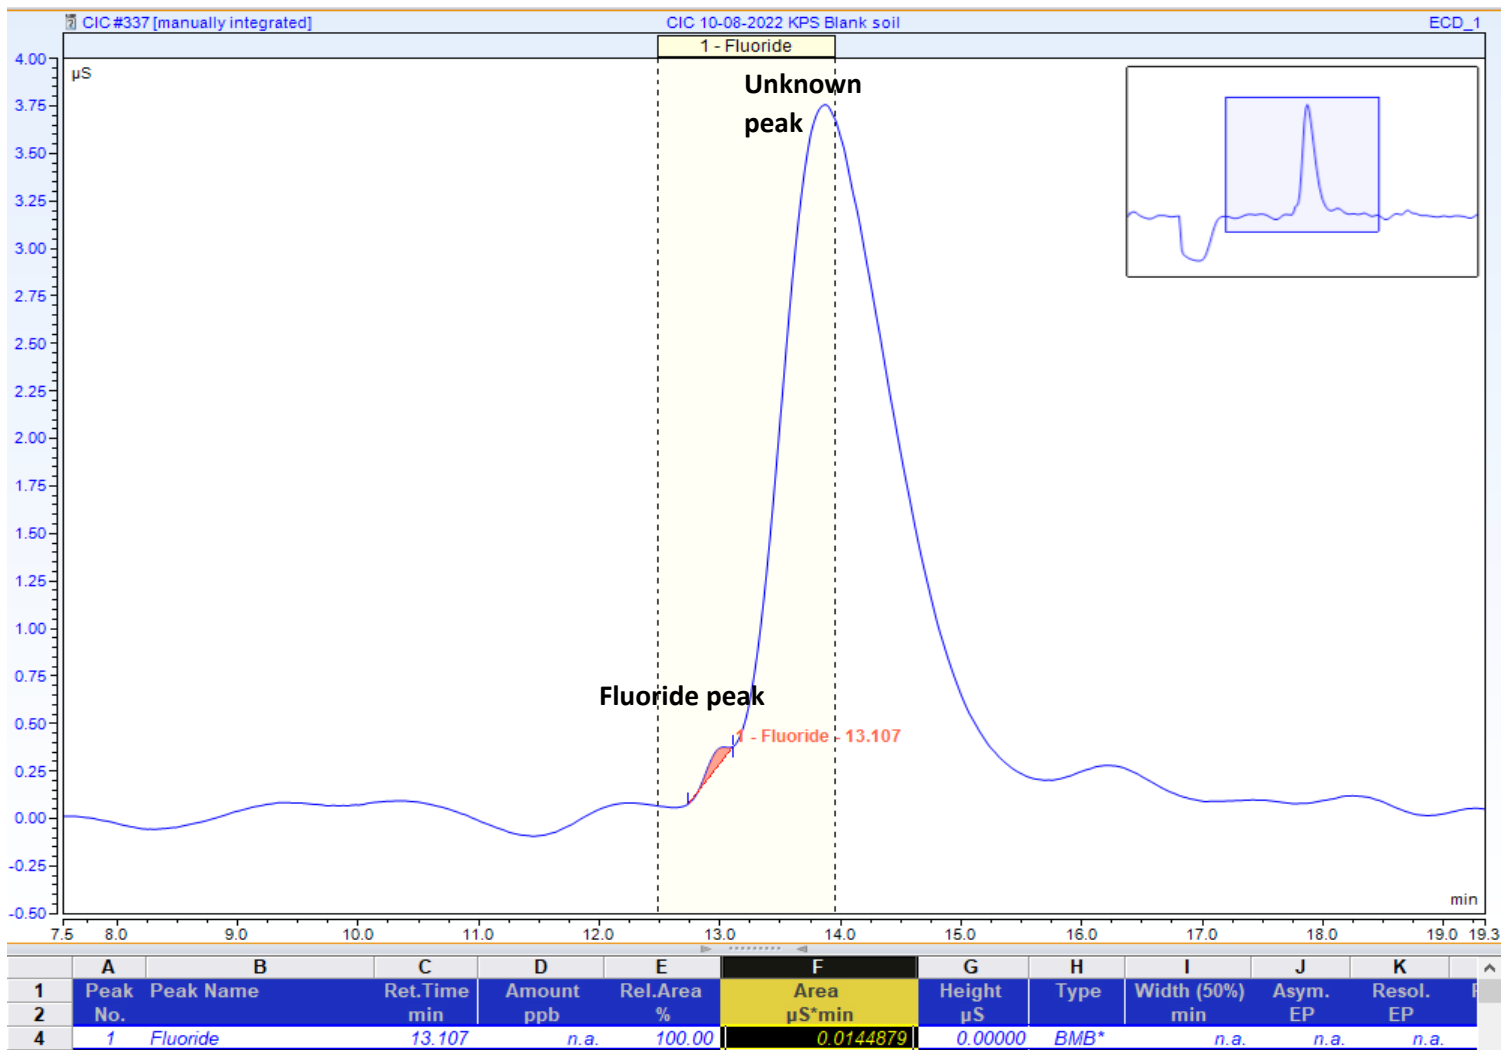

Figure S2. Klippitztörl soil ion chromatogram with CIC in KPS blank soil from a non-skiing area.

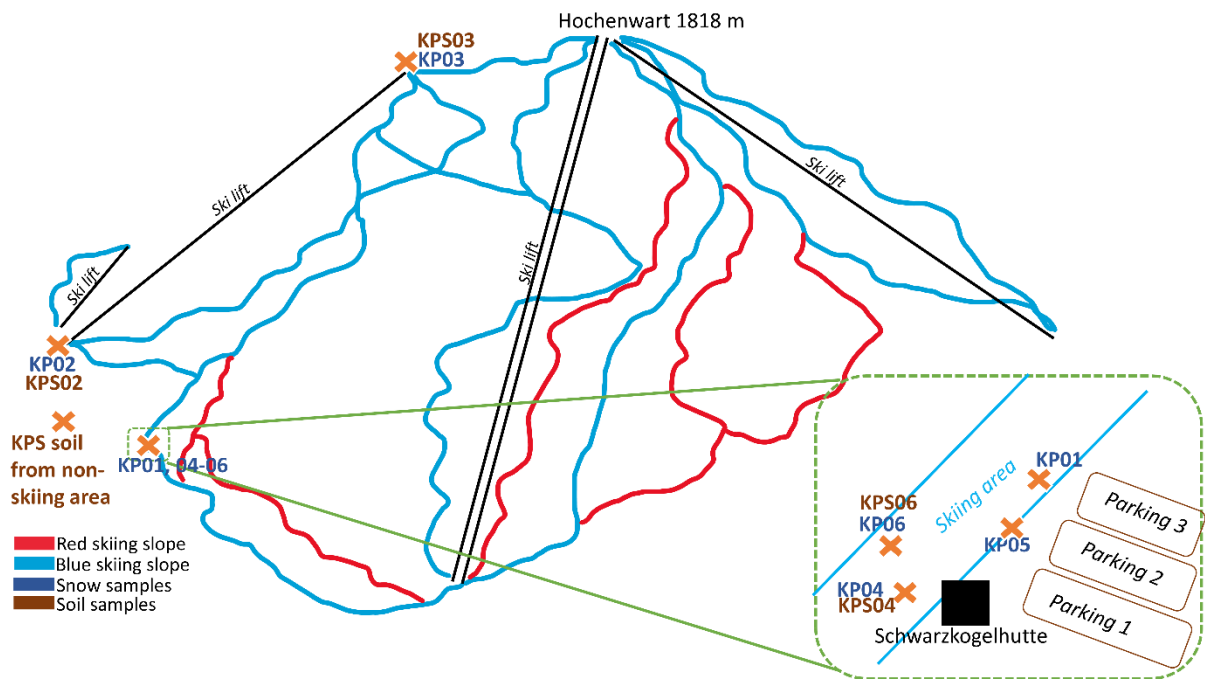

Figure S3a. Sampling area and samples from Klippitztörl site.

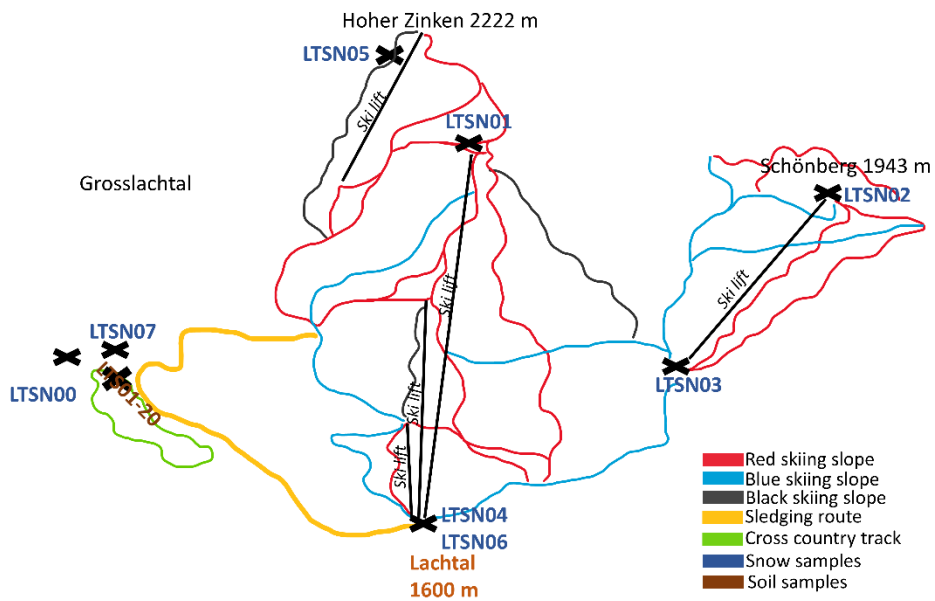

Figure S3b. Sampling area and samples from Lachtal site.

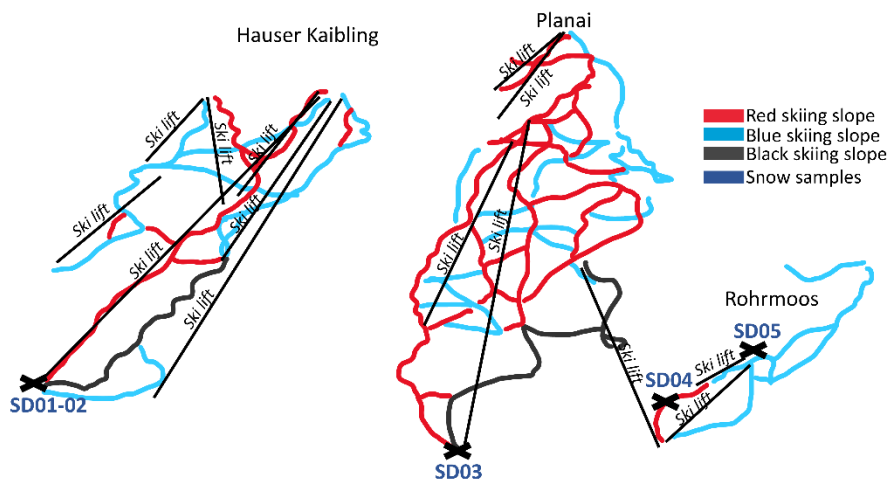

Figure S3c. Sampling area and samples from Schladming site.

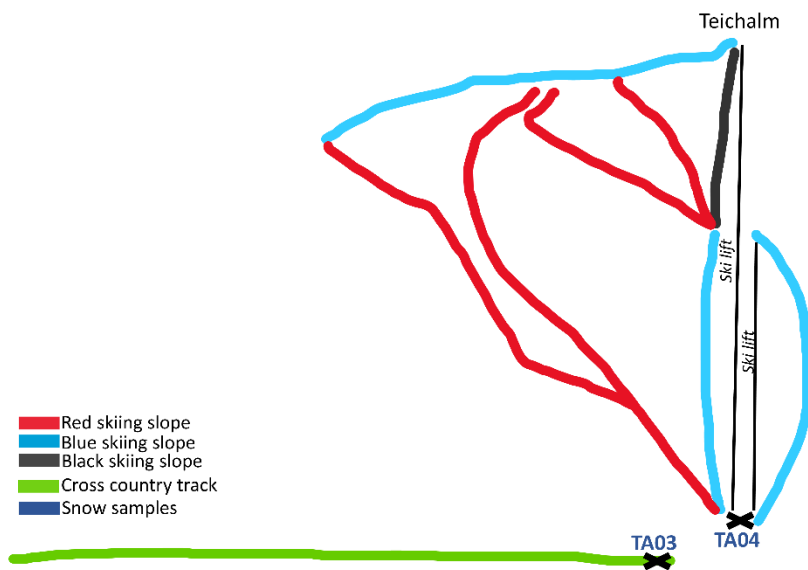

Figure S3d. Sampling area and samples from Teichalm site.

1. Taniyasu S, Kannan K, So MK, Gulkowska A, Sinclair E, Okazawa T, et al. Analysis of fluorotelomer alcohols, fluorotelomer acids, and short- and long-chain perfluorinated acids in water and biota. *J Chromatogr A*. 2005;1093(1–2):89–97
2. Higgins CP, Field JA, Criddle CS, Luthy RG. Quantitative Determination of Perfluorochemicals in Sediments and Domestic Sludge. *Environ Sci Technol*. 2005;39(11):3946–56.
3. Plassmann MM, Berger U. Trace Analytical Methods for Semifluorinated n -Alkanes in Snow, Soil, and Air. *Anal Chem*. 2010;82(11):4551–7.
4. Mesko MF, Costa VC, Pereira RM, Hartwig CA. Chlorine and Fluorine Determination in Eye-Pencil: Development of an Eco-Friendly Sample Preparation Method for Ion Chromatography Analysis. *Artic J Braz Chem Soc*. 2019;30(10): 2191-98.
5. Picoloto RS, Enders MSP, Doneda M, Iop GD, Duarte FA, Barin JS, et al. An in situ pre-concentration method for fluorine determination based on successive digestions by microwave-induced combustion. *Talanta*. 2019;194:314–9.
6. Mesko MF, Balbinot FP, Scaglioni PT, Nascimento MS, Picoloto RS, da Costa VC. Determination of halogens and sulfur in honey: a green analytical method using a single analysis. *Anal Bioanal Chem*. 2020;412(24):6475–84.
7. Schultes L, Peaslee GF, Brockman JD, Majumdar A, McGuinness SR, Wilkinson JT, et al. Total Fluorine Measurements in Food Packaging: How Do Current Methods Perform? *Environ Sci Technol Lett*. 2019;6(2):73–8.
8. Akhdhar A, Schneider M, Orme A, Schultes L, Raab A, Krupp EM, et al. The use of high resolution graphite furnace molecular absorption spectrometry (HR -MAS) for total fluorine determination in extractable organofluorines (EOF). *Talanta [Internet]*. 2020;209:120466.
